# Supplementary material for: Evidence-Based Indicator Approach to Identify Environmental Impacts of Cascade Dam Projects: A Case Study of Cascade Dam Projects on the Yangtze River
Source: MDPI journal article supplement (doi:10.3390/w14162572), 2022-08-20
Supplement: s1 [file s1]

Archive with 1 entries (1 files):
- water-1769730-supplementary.pdf
