# Supplementary material for: Evidence-Based Indicator Approach to Identify Environmental Impacts of Cascade Dam Projects: A Case Study of Cascade Dam Projects on the Yangtze River
Source: MDPI journal article supplement (doi:10.3390/w14162572), 2022-08-20
Supplement: s1 [file s1 › water-1769730-supplementary.pdf]

# Supplementary materials

## Tables

**Table S1.** River function indicators used to develop the science-based questionnaire presented in this paper (indicators and table taken and modified from Parish et al., 2019; Pracheil et al., 2019 and McManamay et al., 2020).

| Category                                                                                                                                                                                                                                                                                                                                       | ID  | Name                                                          | Description                                                                                                                                                                                                      |
|------------------------------------------------------------------------------------------------------------------------------------------------------------------------------------------------------------------------------------------------------------------------------------------------------------------------------------------------|-----|---------------------------------------------------------------|------------------------------------------------------------------------------------------------------------------------------------------------------------------------------------------------------------------|
| <p>Biota and Biodiversity (BB): Shifts in aquatic, riparian and terrestrial populations and communities have been linked to several aspects of hydropower construction and operation and impacts to aquatic and terrestrial habitats. Accurate assessments of population and community are required to assess the health of the ecosystem.</p> | F1  | Abundance, density                                            | Count or other measures of organisms per area                                                                                                                                                                    |
|                                                                                                                                                                                                                                                                                                                                                | F51 | Algae/ primary productivity (BB)                              | Measures for algal populations and communities forming basal food web resources                                                                                                                                  |
|                                                                                                                                                                                                                                                                                                                                                | F5  | Behavior, movement, colonization, extinction                  | Behavior of organisms in study area, including colonization, movement patterns, distance, duration, timing, frequency and/or extinction                                                                          |
|                                                                                                                                                                                                                                                                                                                                                | F6  | Demographics, age, sex, size                                  | Population demographics, including age, sex, and size                                                                                                                                                            |
|                                                                                                                                                                                                                                                                                                                                                | F7  | Fitness, survival, growth, condition, reproduction, mortality | Fitness, survival, growth, condition, reproduction, or mortality of organisms                                                                                                                                    |
|                                                                                                                                                                                                                                                                                                                                                | F8  | Functional group, or species or trait composition             | Grouping of organisms by functional or trait status, percentage composition                                                                                                                                      |
|                                                                                                                                                                                                                                                                                                                                                | F9  | Genetics, mixing, meta-population                             | Genetics and population mixing, including meta-population dynamics                                                                                                                                               |
|                                                                                                                                                                                                                                                                                                                                                | F10 | Habitat, critical habitat, or surrogates of such              | Indices of organism habitat, including habitat area, suitability, etc.                                                                                                                                           |
|                                                                                                                                                                                                                                                                                                                                                | F11 | Internal composition nutrient abnormalities                   | Nutritional composition and makeup of organisms, including elemental stoichiometry; includes levels of internal homeostasis, as well as morphological, genetic, or hormonal abnormalities caused by contaminants |
|                                                                                                                                                                                                                                                                                                                                                | F2  | Life history trait characteristics                            | Life history trait characteristics and their values, such as duration of spawning, fecundity, reproductive mode (characteristics themselves and not the composition of the community)                            |
|                                                                                                                                                                                                                                                                                                                                                | F3  | Presence, absence, occupancy, or detection                    | Organism presence/absence in an area (including pseudo-absence), occupancy, and detection probability                                                                                                            |
| <p>Water Quality (WQ): Water quality characteristics can be directly</p>                                                                                                                                                                                                                                                                       | F4  | Species diversity                                             | Species richness, diversity, evenness, or indices-of-biotic-integrity metrics used to characterize one or more components of the biotic community                                                                |
|                                                                                                                                                                                                                                                                                                                                                | F40 | Algae/ primary productivity (WQ)                              | Algal concentration including measures of primary productivity such as chlorophyll A or cyanotoxin                                                                                                               |

|                                                                                                                                                                                                                                                  |        |                                              |                                                                                                                                                                                                 |
|--------------------------------------------------------------------------------------------------------------------------------------------------------------------------------------------------------------------------------------------------|--------|----------------------------------------------|-------------------------------------------------------------------------------------------------------------------------------------------------------------------------------------------------|
| or indirectly affected by hydro-power development and operation. Changes in water quality can adversely affect the health of humans and wildlife                                                                                                 | F41    | Buffering capacity                           | Characteristics including pH, alkalinity                                                                                                                                                        |
|                                                                                                                                                                                                                                                  | F42    | Dissolved gasses                             | Concentration of non-greenhouse gases in water                                                                                                                                                  |
|                                                                                                                                                                                                                                                  | F43    | Dissolved oxygen                             | Dissolved oxygen in water                                                                                                                                                                       |
|                                                                                                                                                                                                                                                  | F44    | Ecosystem function                           | Ecosystem vital rates and processes, including gross primary productivity, respiration, biochemical oxygen demand                                                                               |
|                                                                                                                                                                                                                                                  | F45    | Gas emissions                                | Concentration and ebullition of water-origin greenhouse gases                                                                                                                                   |
|                                                                                                                                                                                                                                                  | F46    | Key elements                                 | Elements and compounds that are not listed on the EPA Toxic and Priority Pollutants list                                                                                                        |
|                                                                                                                                                                                                                                                  | F47    | Macro-molecular pollutants                   | Pollutants listed on the EPA Toxic and Priority Pollutants list that are not included in other EMH categories                                                                                   |
|                                                                                                                                                                                                                                                  | F48    | Nutrients and organic material (C, N, P)     | Dissolved organic carbon and other organic non-pollutants essential to life, including nitrogen, phosphorous, and inorganic carbon                                                              |
|                                                                                                                                                                                                                                                  | F49    | Solid transport, turbidity, and conductivity | Descriptions of dissolved and suspended solids in water such as turbidity, suspended or dissolved solids, conductance                                                                           |
|                                                                                                                                                                                                                                                  | F50    | Water temperature                            | Water temperature                                                                                                                                                                               |
| Geomorphology (GM): Hydro-power development can disrupt a river system's geomorphologic equilibrium through altered sediment and flow regimes, which influence the availability and quality of habitat for plants and animals within the system  | F15    | Catchment and basin attributes               | Upland soil characteristics, topography, and landscape erodibility metrics that could influence soil erosion and wasting related and subsequent sedimentation related to hydropower development |
|                                                                                                                                                                                                                                                  | F16    | Channel                                      | Channel properties such as bankfull width, wetted width, bankfull discharge, channel slope, braided channel, channelization                                                                     |
|                                                                                                                                                                                                                                                  | F17    | Floodplain valley                            | Metrics related to channel confinement, entrenchment, migration, etc.                                                                                                                           |
|                                                                                                                                                                                                                                                  | F18    | Sediment and substrate                       | Sediment and substrate properties such as substrate particle size, bedload, sediment entrainment or deposition, bedrock composition                                                             |
| Connectivity and Fragmentation (CF): Dams and reservoirs disrupt aquatic, riparian, and terrestrial connectivity, all of which can directly affect the habitat quantity and quality for organisms in an ecosystem                                | F12    | Basin area                                   | Some aspect of area of river basin                                                                                                                                                              |
|                                                                                                                                                                                                                                                  | F13    | Dendritic network and riverscape             | Fragment length, dendritic connectivity index, barrier index, river distance between dams and projects                                                                                          |
|                                                                                                                                                                                                                                                  | F14    | Fish passage                                 | Mitigated fish passage, including presence of upstream or downstream passage or length of bypass                                                                                                |
|                                                                                                                                                                                                                                                  | F52    | Spillage & turbine entrainment               | Entrainment in the spillage & turbine environment such as fish, sediments                                                                                                                       |
| Water Quantity (HD): Hydro-power development can alter the hydrologic cycle by impounding free-flowing water, increased evaporation, and altered groundwater recharge. Because dam operations may serve many purposes, temporal changes to water | F24    | Basin attributes                             | Attributes related to factors that influence hydrology (or were used in the context of hydrology), such as climate and precipitation                                                            |
|                                                                                                                                                                                                                                                  | F25    | Diversion                                    | Quantitative properties of diversions such as volume or discharge of diversion or water for other uses                                                                                          |
|                                                                                                                                                                                                                                                  | F26-31 | Downstream discharge                         | Measures that describe the magnitude, frequency, duration, periodicity, and timing of flows downstream of a hydropower facility, including changes to these characteristics                     |

|                                                                                    |        |                                     |                                                                                                                                                                                                                                                                                                                                                                                                                                                                                           |
|------------------------------------------------------------------------------------|--------|-------------------------------------|-------------------------------------------------------------------------------------------------------------------------------------------------------------------------------------------------------------------------------------------------------------------------------------------------------------------------------------------------------------------------------------------------------------------------------------------------------------------------------------------|
| quantity affect human and wild-life populations through altered water availability | F26    | Downstream discharge duration       | Downstream discharge duration, where duration is the period associated with a specific flow condition (Poff et al., 1997)                                                                                                                                                                                                                                                                                                                                                                 |
|                                                                                    | F27    | Downstream discharge frequency      | Downstream discharge frequency, where frequency refers to how often a flow above a given magnitude recurs over some specified time interval (Poff et al., 1997)                                                                                                                                                                                                                                                                                                                           |
|                                                                                    | F28    | Downstream discharge magnitude      | Downstream discharge magnitude, where magnitude is equivalent to the amount of water moving past a fixed location per unit time (Poff et al., 1997)                                                                                                                                                                                                                                                                                                                                       |
|                                                                                    | F29    | Downstream discharge periodicity    | Downstream discharge periodicity, meaning the order of occurrence of events of a certain magnitude (e.g., did the ten largest floods over a 100-year period all take place in the first 10 years?); flow periodicity affects sediment erosion and deposition as well as the life history completeness of aquatic species; periodicity results from complex interactions of local climate, basin topography, land use patterns, riverbed morphology, and other factors (Yang et al., 2014) |
|                                                                                    | F30    | Downstream discharge rate-of-change | Downstream discharge rate-of-change, i.e., flashiness, refers to how quickly flow changes (Poff et al., 1997)                                                                                                                                                                                                                                                                                                                                                                             |
|                                                                                    | F31    | Downstream discharge timing         | Downstream discharge timing, where timing refers to the regularity (i.e., predictability) with which flow of a defined magnitude occurs (Poff et al., 1997)                                                                                                                                                                                                                                                                                                                               |
|                                                                                    | F32    | Groundwater                         | Groundwater characteristics                                                                                                                                                                                                                                                                                                                                                                                                                                                               |
|                                                                                    | F33-39 | Upstream hydrology                  | Reservoir hydrological characteristics such as residence time, reservoir fluctuation, reservoir surface area, or degree of regulation; Measures describing the magnitude, frequency, duration, periodicity, and timing of flows upstream of a hydro-power facility, including changes to these characteristics                                                                                                                                                                            |
|                                                                                    | F33    | Reservoir hydrology                 | Reservoir hydrological characteristics such as residence time, reservoir fluctuation, reservoir surface area, or degree of regulation                                                                                                                                                                                                                                                                                                                                                     |
|                                                                                    | F34    | Upstream inflow duration            | Upstream inflow duration, where duration is the period of time associated with a specific flow condition (Poff et al., 1997)                                                                                                                                                                                                                                                                                                                                                              |
|                                                                                    | F35    | Upstream inflow frequency           | Upstream inflow frequency, where frequency refers to how often a flow above a given magnitude recurs over some specified time interval (Poff et al., 1997)                                                                                                                                                                                                                                                                                                                                |
|                                                                                    | F36    | Upstream inflow magnitude           | Upstream inflow magnitude, where magnitude is equivalent to the amount of water moving past a fixed location per unit time (Poff et al., 1997)                                                                                                                                                                                                                                                                                                                                            |
|                                                                                    | F37    | Upstream inflow periodicity         | Upstream inflow periodicity, meaning the order of occurrence of events of a certain magnitude (e.g., did the ten largest floods over a 100-year period all take place in the first 10 years?); flow periodicity affects sediment erosion and deposition as well as the life history completeness of aquatic species; periodicity results from complex interactions of local climate, basin                                                                                                |

|                                                                                                                                                                                                                                                                                                                                                                                  |     |                                   |                                                                                                                                                        |
|----------------------------------------------------------------------------------------------------------------------------------------------------------------------------------------------------------------------------------------------------------------------------------------------------------------------------------------------------------------------------------|-----|-----------------------------------|--------------------------------------------------------------------------------------------------------------------------------------------------------|
|                                                                                                                                                                                                                                                                                                                                                                                  |     |                                   | topography, land use patterns, riverbed morphology, and other factors (Yang et al., 2014)                                                              |
|                                                                                                                                                                                                                                                                                                                                                                                  | F38 | Upstream inflow rate-of-change    | Upstream inflow rate-of-change, i.e., flashiness, refers to how quickly flow changes (Poff et al., 1997)                                               |
|                                                                                                                                                                                                                                                                                                                                                                                  | F39 | Upstream inflow timing            | Upstream inflow timing, where timing refers to the regularity (i.e., predictability) with which flow of a defined magnitude occurs (Poff et al., 1997) |
| Land Cover (LC): Land cover influences many other environmental properties ranging from river and floodplain sedimentation rates to fragmentation of habitats and wildlife populations. Land cover changes can include increases in wetted surface from reservoir formation, and fragmentation of the surrounding landscape by infrastructure (e.g., transmission lines, roads). | F19 | Area impacted, project area       | Project boundary area, area impacted by the project as whole, not related to reservoir inundation or land cover                                        |
|                                                                                                                                                                                                                                                                                                                                                                                  | F20 | Floodplain or riparian vegetation | Properties of floodplain or riparian vegetation such as riparian encroachment or floodplain area                                                       |
|                                                                                                                                                                                                                                                                                                                                                                                  | F21 | Land cover class                  | Type of land cover, changes in land cover                                                                                                              |
|                                                                                                                                                                                                                                                                                                                                                                                  | F22 | Protected land                    | Spatial properties of protected lands including losses or increases                                                                                    |
|                                                                                                                                                                                                                                                                                                                                                                                  | F23 | Reservoir inundation              | Reservoir area, upland or floodplain inundation, biomass inundated/lost                                                                                |

**Table S2.** Science-based questions (SBQ) provided to evaluate potential effects of dams on river functions.(questions modified from Parish et al., 2019; Pracheil et al., 2019 and McManamay et al., 2020).

| Question_ID | Question                                                                                                       | Project Type | Area       | Biota | Taxa          | Key Q | Reference                                                                                                                                                                                                                       |
|-------------|----------------------------------------------------------------------------------------------------------------|--------------|------------|-------|---------------|-------|---------------------------------------------------------------------------------------------------------------------------------------------------------------------------------------------------------------------------------|
| Q_1         | Are bare banks of the reservoir apparent and prone to erosion?                                                 | EHA + NPD    | Reservoir  | N     | Not           | No    | Hale & Bayne 1982                                                                                                                                                                                                               |
| Q_2         | Are certain fluvial specialists requiring distinct flow regimes missing from the downstream river community?   | EHA + NPD    | Downstream | Y     | Not           | No    | Anderson et al. 2006; Mims & Olden 2013; McManamay & Frimpong 2015; McManamay et al. 2013; Travnicek & Maceina 1994; Freeman et al. 2001; Balcombe et al. 2011; Perkin & Bonner 2011; García et al. 2011; Humphries et al. 1999 |
| Q_3         | Are aquatic communities dominated by one or a few species (relative to expected richness)?                     | EHA + NPD    | Downstream | Y     | Taxa-Specific | No    | Taylor et al. 2014; Quinn & Kwak 2003; Suttikus & Mettee 2009; Mortenson & Weisberg 2010; Olden et al. 2006                                                                                                                     |
| Q_4         | Are aquatic species that require certain turbidity levels missing from the downstream river community or rare? | EHA + NPD    | Downstream | Y     | Taxa-Specific | No    | Hoagstrom et al. 2008; Worthington et al. ; Wildhaber et al. 2000                                                                                                                                                               |
| Q_5         | Are floodplain vegetation communities dominated by                                                             | EHA + NPD    | Downstream | N     | Taxa-Specific | No    | Braatne et al. 2007; Catford et al. 2011; DeWine et al. 2007; Mortenson et al.                                                                                                                                                  |

|      |                                                                                                                                                                  |           |             |   |               |     |                                                                                                                                       |
|------|------------------------------------------------------------------------------------------------------------------------------------------------------------------|-----------|-------------|---|---------------|-----|---------------------------------------------------------------------------------------------------------------------------------------|
|      | invasives or generalist plant species?                                                                                                                           |           |             |   |               |     | 2010; Stromberg et al.2007; Thomas 1996; Townsend 2001                                                                                |
| Q_6  | Are floodplain vegetation communities missing flood-dependent species?                                                                                           | EHA + NPD | Down-stream | N | Taxa-Specific | No  | Braatne et al. 2007; Catford et al. 2011; DeWine et al. 2007; Mortenson et al. 2010; Stromberg et al.2007; Thomas 1996; Townsend 2001 |
| Q_7  | Are flows over the spillway flowing into a large or deep plunge pool?                                                                                            | All       | Project     | N | Not           | No  |                                                                                                                                       |
| Q_8  | Are invasive species found in project lands or waters?                                                                                                           | All       | Basin       | Y | Taxa-Specific | No  | Havel et al. 2005; Olden et al. 2006; Johnson et al. 2008; Mortenson & Weisberg 2010                                                  |
| Q_9  | Are large amounts of sediment accumulating at river tributary junctions with reservoir?                                                                          | EHA + NPD | Reservoir   | N | Not           | No  | Haregeweyn et al. 2006; Baade et al. 2012                                                                                             |
| Q_10 | Are natural barriers to fish migration absent downstream of project?                                                                                             | All       | Basin       | N | Not           | Yes |                                                                                                                                       |
| Q_11 | Are particular methods well suited for collecting a given focal species while other methods are maladapted for species detection?                                | All       | Basin       | Y | Taxa-Specific | No  | McManamay et al. 2014; Murchie et al. 2008                                                                                            |
| Q_12 | Are portions of the historically active floodplain currently inactive (i.e., not inundated at any point during most years)?                                      | EHA + NPD | Down-stream | N | Not           | No  | Pearsal et al. 2005; Karim et al. 2015                                                                                                |
| Q_13 | Are sensitive species or focal species life histories, reproductive behaviors, and habitat requirements poorly known?                                            | All       | Basin       | Y | Taxa-Specific | No  | Vaughn & Taylor 2000                                                                                                                  |
| Q_14 | Are sensitive species or species expected to be common rare in surveys?                                                                                          | All       | Basin       | Y | Taxa-Specific | No  | Wildhaber et al. 2000; Kupferberg et al. 2012                                                                                         |
| Q_15 | Are surficial stream bed grain sizes appear very coarse or devoid of sand and gravel substrates compared to neighboring streams of similar geology and gradient? | EHA + NPD | Down-stream | N | Not           | No  | Kondolf et al. 1997; Brandt 2000; Graf 2006; McManamy et al. 2010; Grant 2012; Kobayashi et al. 2008                                  |

|      |                                                                                                                                                                                         |           |         |   |               |    |                                                                                                                                                                                        |
|------|-----------------------------------------------------------------------------------------------------------------------------------------------------------------------------------------|-----------|---------|---|---------------|----|----------------------------------------------------------------------------------------------------------------------------------------------------------------------------------------|
| Q_16 | Does the project have facilities located in close proximity up or downstream (ie., part of a cascade)?                                                                                  | All       | Basin   | N | Not           | No | FERC 2015; McManamay et al. 2016; Grill et al. 2015; Nicols et al. 2006; Ouyang et al. 2010; Zhai et al. 2010; Li et al. 2012                                                          |
| Q_17 | Are there eutrophication or algal blooms in close proximity (immediately upstream or downstream) or in reservoir of the project?                                                        | All       | Basin   | N | Not           | No | Wang et al. 2012; Chen et al. 2011; Carneiro et al, 2014                                                                                                                               |
| Q_18 | Are there excessive heavy metals in close proximity (immediately upstream or downstream) or in reservoir of the project?                                                                | All       | Basin   | N | Not           | No | Carneiro et al, 2014                                                                                                                                                                   |
| Q_19 | Are there activities or land-cover in the ustream basin that could influence hydrology and operations at the facility?                                                                  | All       | Basin   | N | Not           | No | Stickler et al. 2013; Knoll et al. 2003; Smedberg et al. 2009                                                                                                                          |
| Q_20 | Are certain fish and invertebrate (or other) functional groups or regionally representative species missing from the project lands or waters that would be expected in this system?     | EHA + NPD | Project | Y | Taxa-Specific | No | Liermann et al. 2012; Oliveira et al. 2017; Taylor et al. 2014; Quinn & Kwak 2003; Suttkus & Mettee 2009; Mims & Olden 2013; Olden et al. 2006                                         |
| Q_21 | Are there complex life histories of organisms that display significant movement or complex behaviors for feeding, reproduction, or refugia?                                             | All       | Basin   | Y | Taxa-Specific | No |                                                                                                                                                                                        |
| Q_22 | Is there evidence of elevated nutrient loads to project waters?                                                                                                                         | All       | Basin   | N | Not           | No | Knoll et al. 2003; Smedberg et al. 2009; Jones et al. 2004                                                                                                                             |
| Q_23 | Are there IUCN-listed species, China Red Data Book of Endangered Animals-listed species, or species of concern found in or adjacent to project lands or waters?                         | All       | Basin   | Y | Taxa-Specific | No | Jelks et al. 2008; Ziv et al. 2012; Grumbine and Pandit 2013; Pandit and Grumbine 2012; Wildhaber et al. 2000; Kupferberg et al. 2012; Chen, et al, 1998; IUCN Red list of threatened. |
| Q_24 | Are there factors upstream or downstream that may compete with project operations, such as reservoirs, water control structures, diversions, canals, intakes/discharges, or irrigation? | All       | Basin   | N | Not           | No | FERC 2015; Kanno & Vokoun 2010; Freeman Marcinek 2006; Gibbins et al. 2001; McManamay et al. 2014; Poff and Hart 2002; Gibbins et al. 2001; Hanasaki et al. 2006; Gordon et al. 2005   |

|      |                                                                                                                                                                                                |           |            |   |               |    |                                                                                                     |
|------|------------------------------------------------------------------------------------------------------------------------------------------------------------------------------------------------|-----------|------------|---|---------------|----|-----------------------------------------------------------------------------------------------------|
| Q_25 | Are there fish consumption advisories in the reservoir, downstream river, region or watershed?                                                                                                 | All       | Basin      | N | Not           | No | Cunningham et al. 1994; EPA 2011                                                                    |
| Q_26 | Are there juveniles of an endangered species that may move downstream through turbines?                                                                                                        | All       | Project    | Y | Taxa-Specific | No | Coutant and Whitney 2000; Brown et al. 2012                                                         |
| Q_27 | Are there migratory species or species that require riverine dispersal to complete life history requirements located in proximity to the project?                                              | All       | Basin      | Y | Taxa-Specific | No | Perkin and Gido 2012; Perkin et al. 2014; Vaughn & Taylor 2000; Dudley & Platania 2007              |
| Q_28 | Are there notable changes in fish and invertebrate community, loss of richness or important indicator groups compared to surrounding streams?                                                  | EHA + NPD | Downstream | Y | Taxa-Specific | No | Pozo et al. 1997                                                                                    |
| Q_29 | Are there reports of fish kills in project waters?                                                                                                                                             | EHA + NPD | Project    | N | Not           | No |                                                                                                     |
| Q_30 | Are there reports of hazardous water pollution accidents in project waters?                                                                                                                    | EHA + NPD | Project    | N | Not           | No |                                                                                                     |
| Q_31 | Are there terrestrial IUCN-listed species, China Red Data Book of Engangered Animals-listed species, species of concern, or critical habitats found in or adjacent to project lands or waters? | All       | Basin      | Y | Taxa-Specific | No | Grumbine and Pandit 2013; Pandit and Grumbine 2012; Chen, et al, 1998; IUCN Red list of threatened. |
| Q_32 | Are there water quality issues in the project waters related to upstream or adjacent land use near reservoirs?                                                                                 | All       | Basin      | N | Not           | No | Knoll et al. 2003; Smedberg et al. 2009; Jones et al. 2004                                          |
| Q_33 | Are upland areas within or adjacent to project boundaries characterized by steep terrain (at least 20% slope)?                                                                                 | All       | Basin      | N | Not           | No | Elliot & Hall 1997; Laflen et al. 1997; Stickler et al. 2013                                        |
| Q_34 | Could abundance or density values of focal species provide insights into habitat needs, suitability, or limited habitats?                                                                      | All       | Basin      | Y | Taxa-Specific | No | Wildhaber et al. 2000; Kupferberg et al. 2012                                                       |
| Q_35 | Do any of the project reservoirs have a Degree of Regulation $\geq 4\%$ (DOR is the %                                                                                                          | All       | Project    | N | Not           | No | Nilsson et al. 2005; Lehner et al. 2011                                                             |

|      |                                                                                                                                                       |           |            |   |               |     |                                                                                                                                                    |
|------|-------------------------------------------------------------------------------------------------------------------------------------------------------|-----------|------------|---|---------------|-----|----------------------------------------------------------------------------------------------------------------------------------------------------|
|      | of annual flow potentially stored by a dam)                                                                                                           |           |            |   |               |     |                                                                                                                                                    |
| Q_36 | Do any of the sensitive species or species of concern constitute a representative sub-population (or nested population) of a greater meta-population? | All       | Basin      | Y | Taxa-Specific | No  | Fullerton et al. 2011; Weigel et al. 2013                                                                                                          |
| Q_37 | Do any fish have external lesions, curved spines, malformations?                                                                                      | EHA + NPD | Project    | Y | Not           | Yes | Schleiger 2004; Adams 1990; Adams et al. 1993; Van den Avyle et al. 1989                                                                           |
| Q_38 | Do any fish have hemorrhaging or bloating of stomach, odd swimming behavior, presence of bubbles under thin dermal layers?                            | EHA + NPD | Downstream | Y | Not           | Yes |                                                                                                                                                    |
| Q_39 | Do habitat conditions below the dam consist of a dry stream or stagnant pools with little flowing water?                                              | EHA + NPD | Downstream | N | Not           | No  | McManamay et al. 2015                                                                                                                              |
| Q_40 | Do hydrologic statistics (e.g., Indicators of Hydrologic Alteration) show at least 20% + or - changes from inflows?                                   | EHA + NPD | Downstream | N | Not           | No  | Richter et al. 2012; Richter et al. 1996, 1998; Poff et al. 2010; Sakaris 2013                                                                     |
| Q_41 | Do migratory aquatic species occur downstream of the facility, but not upstream of the facility?                                                      | EHA + NPD | Basin      | Y | Taxa-Specific | No  | Catalano et al. 2007; Kiffney et al. 2008; Benstead et al. 1999; Hall et al. 2011; Young et al. 2012; Harford & McLaughlin 2007; Jager et al. 2015 |
| Q_42 | Do nearest downstream facilities have a fish passage facility?                                                                                        | All       | Basin      | N | Not           | No  | McKay et al. 2013; Schram et al. 2016; DeRolph et al. 2016; Young et al. 2012                                                                      |
| Q_43 | Do noxious, invasive, or hyperabundant algal blooms or mats (e.g., Didymo) occur in the downstream river of the project?                              | EHA + NPD | Downstream | N | Not           | Yes | Cooke 1980; Thomson et al. 2005; Flinders & Hart 2009                                                                                              |
| Q_44 | Do noxious, invasive, or hyperabundant algal blooms or mats (e.g., Didymo) occur in the reservoir?                                                    | EHA + NPD | Reservoir  | N | Not           | No  | Cooke 1980; Thomson et al. 2005; Flinders & Hart 2009                                                                                              |
| Q_45 | Do point and lateral bars show signs of inactive maintenance (i.e., covered in vegetation, little influence of deposition and erosion by flows)?      | EHA + NPD | Downstream | N | Not           | No  | Trush et al. 2000; Draught et al. 2011                                                                                                             |

|      |                                                                                                                                                                                    |           |            |   |               |     |                                                                                                                                                         |
|------|------------------------------------------------------------------------------------------------------------------------------------------------------------------------------------|-----------|------------|---|---------------|-----|---------------------------------------------------------------------------------------------------------------------------------------------------------|
| Q_46 | Do project operations divert flow through a bypass system around native stream channel?                                                                                            | All       | Project    | N | Not           | Yes | Baker et al. 2010; McManamay et al. 2013                                                                                                                |
| Q_47 | Do species tend to show movement or colonization in response to changes in flows?                                                                                                  | EHA + NPD | Downstream | Y | Taxa-Specific | No  | Bunt et al. 1999; Butler et al. 2011; David & Closs 2002; Decker et al. 2008                                                                            |
| Q_48 | Do surveys suggest that specific age cohorts, size groups, or life stages are missing from occurrences of rare or of-concern species?                                              | EHA + NPD | Project    | Y | Taxa-Specific | No  | Gillette et al. 2005                                                                                                                                    |
| Q_49 | Do upland areas within or adjacent to project boundaries contain highly erosive soils or lack vegetation? (e.g., Erosive soils typically have Rainfall Erosivity Factors > or = 5) | All       | Basin      | N | Not           | No  | Elliot & Hall 1997; Laflen et al. 1997; Stickler et al. 2013; EPA 2017                                                                                  |
| Q_50 | Does "dry dock" occur at any time during the year?                                                                                                                                 | EHA + NPD | Reservoir  | N | Not           | No  | Jaakson 1973; Gabriel 2004                                                                                                                              |
| Q_51 | Does any part of the project waters receive effluent from mine tailings or has mining occurred proximate to the project?                                                           | All       | Basin      | N | Not           | No  |                                                                                                                                                         |
| Q_52 | Does aquatic community richness seem unnaturally low?                                                                                                                              | EHA + NPD | Downstream | Y | Not           | No  | Taylor et al. 2014; Quinn & Kwak 2003; Suttkus & Mettee 2009; Mortenson & Weisberg 2010; Olden et al. 2006; Anderson et al. 2006; Freeman Marcinek 2006 |
| Q_53 | Does evidence suggest that overall ecosystem productivity is limiting healthy fish and invertebrate communities?                                                                   | EHA + NPD | Downstream | Y | Not           | No  |                                                                                                                                                         |
| Q_54 | Does habitat seem homogeneous or lacking in major components (e.g., varied depths, velocities, velocity shelters, etc)?                                                            | EHA + NPD | Downstream | Y | Not           | No  | Orth 1987; Leonard and Orth 1988; Bo-vee 1998                                                                                                           |
| Q_55 | Does or has the project operate a fish passage facility or will the project have plans to include a fish passage facility?                                                         | All       | Project    | Y | Not           | Yes | Schram et al. 2016; DeRolph et al. 2016; Young et al. 2012                                                                                              |

|      |                                                                                                                                                                                                                                 |           |            |   |     |     |                                                                                                      |
|------|---------------------------------------------------------------------------------------------------------------------------------------------------------------------------------------------------------------------------------|-----------|------------|---|-----|-----|------------------------------------------------------------------------------------------------------|
| Q_56 | Does pH in project waters seem very high (>8) or very low (<6) relative to ambient conditions upstream of project?                                                                                                              | All       | Project    | N | Not | Yes | USGS 2016                                                                                            |
| Q_57 | Does signs of scouring during high-flow seasons or high-flow activity appear limited?                                                                                                                                           | EHA + NPD | Downstream | N | Not | No  | Trush et al. 2000; Draught et al. 2011                                                               |
| Q_58 | Does the channel appear excessively miniturized?                                                                                                                                                                                | EHA + NPD | Downstream | N | Not | No  | Nilsson et al. 2000; Takahashi & Nakamura 2011; McManamay et al. 2013                                |
| Q_59 | Does the dam and reservoir prevent the majority of bed-load from upstream sources from reaching reaches below dam?                                                                                                              | All       | Downstream | N | Not | Yes | Kondolf et al. 1997; Graf 2006; Grant 2012; Csiki & Rhoads 2014                                      |
| Q_60 | Does the downstream river (or streams in the region) have "losing" reaches or strong alternating patterns of "losing" and "gaining" systems?                                                                                    | All       | Downstream | N | Not | No  | Stanford et al. 1994; Benenati et al. 1998; Stromberg et al. 2007; Bond et al. 2010                  |
| Q_61 | Does the downstream river support predominantly coldwater fishes or a tailwater trout fishery?                                                                                                                                  | EHA + NPD | Downstream | Y | Not | No  | Krause et al. 2005; Almodóvar & Nicola 1999; McKinney et al. 2011; Nelson 1986; Sabaton et al. 2008  |
| Q_62 | Does the project alter seasonal hydrology or reduce flood magnitude from inflows?                                                                                                                                               | All       | Project    | N | Not | No  | Cushman et al. 1985; McManamay et al. 2016; Fitzhugh & Vogel 2011; Gao et al. 2009; Pozo et al. 1997 |
| Q_63 | Do project operations fall in any category besides run-of-river?                                                                                                                                                                | All       | Project    | N | Not | No  | Cushman et al. 1985; McManamay et al. 2016; Fitzhugh & Vogel 2011; Gao et al. 2009; Pozo et al. 1997 |
| Q_64 | Does the project boundary border or occur adjacent to protected lands (i.e., those managed for wildlife, recreation, conservation, or special purposes by federal/state/local governments, or NGOs, or conservation easements)? | All       | Project    | N | Not | Yes | Hynes & Hanley 2006; Zhao et al. 2010, 2013; Richardson et al. 2000                                  |
| Q_65 | Does the project have a non-integral type dam-powerhouse development, including but not limited to diversion-bypass?                                                                                                            | All       | Project    | N | Not | No  | McManamay et al. 2016; Coutos and Olden 2018;                                                        |
| Q_66 | Does the project have extensive land assets (more than                                                                                                                                                                          | All       | Project    | N | Not | No  | Falcone et al. 2010                                                                                  |

|      |                                                                                                                               |           |         |   |               |     |                                                                                                                                                                                                           |
|------|-------------------------------------------------------------------------------------------------------------------------------|-----------|---------|---|---------------|-----|-----------------------------------------------------------------------------------------------------------------------------------------------------------------------------------------------------------|
|      | just acreage around dam, powerplant, and switchyard)?                                                                         |           |         |   |               |     |                                                                                                                                                                                                           |
| Q_67 | Does the project have multiple developments?                                                                                  | All       | Project | N | Not           | No  | McManamay et al. 2016                                                                                                                                                                                     |
| Q_68 | Does the project have one reservoir larger than > 6000 Megaliters?                                                            | All       | Project | N | Not           | No  | Falcone et al. 2010                                                                                                                                                                                       |
| Q_69 | Does the project have plans to sell lands to an entity or manage lands for conservation purposes?                             | All       | Project | N | Not           | Yes |                                                                                                                                                                                                           |
| Q_70 | Does the project changes any downstream monthly flows larger than 20%?                                                        | EHA + NPD | Project | N | Not           | No  | Poff et al. 2007; Moyle and Mount 2007;                                                                                                                                                                   |
| Q_71 | Does the project induce pressure-related trauma to fish (e.g., fish with bulging eyes or ruptured swim bladders in tailrace)? | EHA       | Project | Y | Taxa-Specific | Yes | Coutant and Whitney 2000; Brown et al. 2012                                                                                                                                                               |
| Q_72 | Does the project occur downstream or adjacent to current or historic industrialization?                                       | All       | Basin   | N | Not           | No  | Smedberg et al. 2009                                                                                                                                                                                      |
| Q_73 | Does the project occur in karst terrain or terrian with complex groundwater interactions?                                     | All       | Basin   | N | Not           | No  | Benenati et al. 1998                                                                                                                                                                                      |
| Q_74 | Does the project occur in region overlying an aquifer with known water shortage issues?                                       | All       | Basin   | N | Not           | No  | Stanford et al. 1994; Perkin et al. 2014; Braatne et al. 2007                                                                                                                                             |
| Q_75 | Does the project operate in a peaking mode or intermediate peaking mode?                                                      | All       | Project | N | Not           | No  | Wehmeyer & Wagner 2011                                                                                                                                                                                    |
| Q_76 | Does the project serve as flood control, or long-term storage?                                                                | All       | Project | N | Not           | No  | Cushman et al. 1985; McManamay et al. 2016; Scruton et al. 2003; Scruton et al. 2008; Bruno et al. 2009; Cereghino & Lavandier 1998; Lauters et al. 1996; Jennings & Freeman 2003; Grabowski & Isely 2007 |
| Q_77 | Does the project operate the spillway more than 1/2 of the time?                                                              | All       | Project | N | Not           | Yes |                                                                                                                                                                                                           |
| Q_78 | Does the project fragment protected land assets (e.g., affecting migratory patterns or                                        | All       | Project | N | Not           | Yes | Dwire & Kauffman 2003; Hu et al. 2011; Johnson 1998                                                                                                                                                       |

|      |                                                                                                                                                   |           |            |   |               |     |                                                                                |
|------|---------------------------------------------------------------------------------------------------------------------------------------------------|-----------|------------|---|---------------|-----|--------------------------------------------------------------------------------|
|      | migratory corridors of wildlife or fire regimes)?                                                                                                 |           |            |   |               |     |                                                                                |
| Q_79 | Does the reservoir have a average depth less than 15 meters?                                                                                      | All       | Reservoir  | N | Not           | No  | Bastviken et al. 2004                                                          |
| Q_80 | Does the reservoir have large amounts of organic matter input (leaves, detritus, wood) or were trees left standing prior to reservoir inundation? | All       | Reservoir  | N | Not           | No  | Fearnside 1995; Duchemin 1995; Bastviken et al. 2004                           |
| Q_81 | Does the reservoir have significant sedimentation and filling?                                                                                    | EHA + NPD | Reservoir  | N | Not           | No  | St. Louis et al. 2000                                                          |
| Q_82 | Does the reservoir or dam impede land or water-based migratory corridors for terrestrial or aquatic species?                                      | All       | Project    | Y | Taxa-Specific | No  | Hu et al. 2011                                                                 |
| Q_83 | Does the reservoir or downstream river support a commercial or recreational fishery?                                                              | EHA + NPD | Project    | Y | Not           | No  | Loomis et al. 1986; Paller 1997; Rulifson 1990                                 |
| Q_84 | Does the reservoir or lower river harbor significant macrophyte communities?                                                                      | EHA + NPD | Reservoir  | N | Not           | No  | Sullivan et al. 2013                                                           |
| Q_85 | Does the reservoir periodically inundate areas of perennial woody plant growth, potentially creating wetlands?                                    | EHA + NPD | Reservoir  | N | Not           | No  |                                                                                |
| Q_86 | Were trees removed from the reservoir prior to inundation?                                                                                        | EHA + NPD | Reservoir  | N | Not           | No  |                                                                                |
| Q_87 | Does the reservoir surface elevation fluctuate more than 10 meters among seasons?                                                                 | All       | Reservoir  | N | Not           | Yes | Paller 1997; Hale & Bayne 1982; Miranda et al. 1984                            |
| Q_88 | Does the stream channel appear highly stabilized or highly channelized ?                                                                          | EHA + NPD | Downstream | N | Not           | No  | Trush et al. 2000;                                                             |
| Q_89 | Has development or operations effected upland areas?                                                                                              | All       | Basin      | N | Not           | No  | Li et al. 2012; Thomas 1996; Stickler et al. 2013; Ervin et al. 2006; EPA 2017 |
| Q_90 | Has land development surrounding the reservoir (and proximate upstream watershed) experienced significant changes since project development?      | EHA + NPD | Reservoir  | N | Not           | No  | Johnson 1998; Zhao et al. 2010, 2013; Ouyang et al. 2009                       |

|       |                                                                                                                                                                                                                  |           |            |   |               |    |                                                                                                          |
|-------|------------------------------------------------------------------------------------------------------------------------------------------------------------------------------------------------------------------|-----------|------------|---|---------------|----|----------------------------------------------------------------------------------------------------------|
| Q_91  | Has past mitigation or in-stream flow proved unsuccessful at improving ecological conditions in project waters?                                                                                                  | EHA + NPD | Downstream | N | Not           | No | McManamay et al. 2013; Bednarek & Hart 2005                                                              |
| Q_92  | Is there evidence of fish injury by spillway passage at the project?                                                                                                                                             | EHA + NPD | Project    | Y | Taxa-Specific | No | Heisey et al. 1996                                                                                       |
| Q_93  | Has the project limited dispersal by organisms such that there are evidence of declines in populations or reproduction?                                                                                          | EHA + NPD | Basin      | Y | Taxa-Specific | No | Faulks et al. 2011; Fullerton et al. 2011; Weigel et al. 2013; Haponski et al. 2007; Skalski et al. 2008 |
| Q_94  | Has the reservoir increased water levels (i.e., decreased depth to groundwater)?                                                                                                                                 | EHA + NPD | Reservoir  | N | Not           | No |                                                                                                          |
| Q_95  | Has the reservoir influenced surrounding community's socioeconomics including influencing adjacent land development?                                                                                             | EHA + NPD | Reservoir  | N | Not           | No | Teigland 1999; Bohlen & Lewis 2009; Hynes & Hanley 2006; Richardson et al. 2000                          |
| Q_96  | Have any habitat classification measures been conducted or proposed for the downstream river or project lands (e.g., mesohabitat classification for PHABSIM) that would support a patch-occupancy type approach? | All       | Basin      | N | Not           | No | McManamay et al. 2014; Peoples et al. 2013                                                               |
| Q_97  | Have backwaters, wetlands, or oxbows been cut off from expected (i.e., natural or target range) exchange of flows and high-flow activity?                                                                        | EHA + NPD | Downstream | N | Not           | No | Frazier & Page 2006; Light et al. 1998; Humphries et al. 1999; Karim et al. 2015; Humphries et al. 2006  |
| Q_98  | Have operations reduced floodplain inundation to be infrequent for this system (less than 50% based on expected or target ranges)?                                                                               | EHA + NPD | Downstream | N | Not           | No | Trush et al. 2000; Nislow et al. 2002; Nilsson et al. 2000; Pearsall et al. 2005; Townsend 2001          |
| Q_99  | Have past biological sampling methodologies within the project area been heterogeneous (conducted under a variety of methods)?                                                                                   | All       | Basin      | Y | Taxa-Specific | No | McManamay et al. 2013; Murchie et al. 2008                                                               |
| Q_100 | If the project operates a fish passage facility, does it inefficiently or uneffectively pass                                                                                                                     | EHA + NPD | Project    | Y | Taxa-Specific | No |                                                                                                          |

|       |                                                                                                                                                               |           |            |   |               |     |                                                                                                                                              |
|-------|---------------------------------------------------------------------------------------------------------------------------------------------------------------|-----------|------------|---|---------------|-----|----------------------------------------------------------------------------------------------------------------------------------------------|
|       | target fish (passage rates < 90%; survival rates < 95%)?                                                                                                      |           |            |   |               |     |                                                                                                                                              |
| Q_101 | Is "irrigation" or "water supply" listed as a congressionally authorized or state authorized purpose of the dam?                                              | All       | Project    | N | Not           | No  |                                                                                                                                              |
| Q_102 | Is DO regularly <5 ppm in any of the project waters?                                                                                                          | EHA + NPD | Project    | N | Not           | Yes | Wehmeyer & Wagner 2011; Water Resource Center 2014                                                                                           |
| Q_103 | Is excess sedimentation and siltation apparent in downstream river compared to neighboring streams of similar geology and gradient?                           | EHA + NPD | Downstream | N | Not           | No  | Baker et al. 2010;                                                                                                                           |
| Q_104 | Is free-flowing river habitat a limiting factor in aquatic or terrestrial organisms completing life history requirements?                                     | EHA + NPD | Basin      | Y | Not           | No  | Perkin and Gido 2012; Perkin et al. 2014; Vaughn & Taylor 2000; Dudley & Platania 2007                                                       |
| Q_105 | Is growth, survival, or recruitment of any rare species or species of concern inhibited or limited by project development or operations?                      | EHA + NPD | Project    | Y | Taxa-Specific | No  | Lukas & Orth 1995; Rulifson 1990; Kupferberg et al. 2012                                                                                     |
| Q_106 | Is intermittency common for streams in the region or the downstream river?                                                                                    | All       | Basin      | N | Not           | No  | Balcombe et al. 2011; Perkin; Bond et al. 2010; Stromberg et al. 2007; Benenati et al. 1998; Bond et al. 2010; Hauer & Lorang 2004           |
| Q_107 | Is mean annual flow downstream of a project at least 10% less than mean annual inflow?                                                                        | EHA + NPD | Downstream | N | Not           | No  | Anderson et al. 2006; Baker et al. 2010; Poff et al. 2010; Freeman & Marcinek 2006; Poff and Hart 2002; McManamay 2014                       |
| Q_108 | Is riparian vegetation encroaching the channel? Does the channel appear excessively and uncharacteristically braided?                                         | EHA + NPD | Downstream | N | Not           | No  | Bohn et al. 2000; Carter Johnson et al. 1995; Nilsson et al. 2000; Takahashi & Nakamura 2011; McManamay et al. 2013; Osterkamp & Hupp (2010) |
| Q_109 | Is invertebrate communities, spawning habitat, and/or recruitment of reservoir sportfish possibly limited by shoreline habitats and water level fluctuations? | EHA + NPD | Reservoir  | Y | Not           | No  | Miranda et al. 1984                                                                                                                          |
| Q_110 | Is spawning of focal species (i.e., any species of concern or importance) never observed or does reproduction                                                 | EHA + NPD | Project    | Y | Taxa-Specific | No  | Kupferberg et al. 2012; Peoples et al. 2013                                                                                                  |

|       |                                                                                                                                                                                                     |           |            |   |               |     |                                                                                                                               |
|-------|-----------------------------------------------------------------------------------------------------------------------------------------------------------------------------------------------------|-----------|------------|---|---------------|-----|-------------------------------------------------------------------------------------------------------------------------------|
|       | appear limited by habitat or conditions?                                                                                                                                                            |           |            |   |               |     |                                                                                                                               |
| Q_111 | Is species recruitment limited by altered sediment sizes or turbidity below the dam?                                                                                                                | EHA + NPD | Downstream | Y | Taxa-Specific | No  | Hoagstrom et al. 2008; Worthington et al. ; Wildhaber et al. 2000                                                             |
| Q_112 | Is the channel confined by embankments (i.e. roads, levees) or unable to migrate if relevant?                                                                                                       | EHA + NPD | Downstream | N | Not           | No  | Trush et al. 2000; Hall et al. 2000; McManamay et al. 2013                                                                    |
| Q_113 | Is the channel slope high ( $\geq 2\%$ ) and have low sinuosity ( $< 1.2$ ) (e.g., high stream power presenting more shear on streambed)?                                                           | All       | Downstream | N | Not           | No  | Brandt 2000; McManamay et al. 2013; Grant 2012                                                                                |
| Q_114 | Is the downstream river missing species expected to occur in the river due to thermal intolerance (e.g., cold-cool water specialists if a cool system, or warm water specialists if a warm system)? | EHA + NPD | Downstream | Y | Not           | No  | Krause et al. 2005; Olden and Naiman 2010; Mims and Olden 2013                                                                |
| Q_115 | Is the ecosystem structure or foodweb structure very complex in the river system (i.e., is food-web modeling needed to understand the system)?                                                      | EHA + NPD | Downstream | Y | Not           | No  | Lauters et al. 1996; Chester & Norris 2006; Pozo et al. 1997                                                                  |
| Q_116 | Is the project located on a river or stream (not a conduit or canal)?                                                                                                                               | All       | Project    | N | Not           | No  | FERC 2018                                                                                                                     |
| Q_117 | Is the project the most downstream facility on a river system (i.e., nearest to estuary) or a major tributary?                                                                                      | All       | Basin      | N | Not           | Yes | Nilsson et al. 2005; FERC 2015; Hall et al. 2011; Young et al. 2012; Harford & McLaughlin 2007; Jager et al. 2015             |
| Q_118 | Is the project the most upstream facility on a river system or major tributary?                                                                                                                     | All       | Basin      | N | Not           | No  | FERC 2015; McManamay et al. 2016; Grill et al. 2015; Nicols et al. 2006; Ouyang et al. 2010; Zhai et al. 2010; Li et al. 2012 |
| Q_119 | Is the reservoir discharge a hypolimnetic or epilimnetic release?                                                                                                                                   | All       | Reservoir  | N | Not           | Yes | Webb and Walling 1997; Krause et al. 2005; Olden and Naiman 2010; McManamay et al. 2013; Preece & Jones 2002                  |
| Q_120 | Is the reservoir highly productive (i.e., have high photosynthetic activity)?                                                                                                                       | EHA + NPD | Reservoir  | N | Not           | No  | Pozo et al. 1997; Wang et al. 2015                                                                                            |
| Q_121 | Is the reservoir relatively new (i.e., new or recent development, last 30 years)?                                                                                                                   | EHA + NPD | Reservoir  | N | Not           | No  | Fearnside 1995; St Louis et al. 2000;                                                                                         |

|       |                                                                                                                                                                    |           |             |   |               |     |                                                                                                                                         |
|-------|--------------------------------------------------------------------------------------------------------------------------------------------------------------------|-----------|-------------|---|---------------|-----|-----------------------------------------------------------------------------------------------------------------------------------------|
| Q_122 | Is the reservoir relatively warm during summer months (>35°C) or occur in a tropical location?                                                                     | All       | Reservoir   | N | Not           | No  | Fearnside 1995; St Louis et al. 2000;                                                                                                   |
| Q_123 | Is the reservoir thermally stratified during any point in the year?                                                                                                | EHA + NPD | Reservoir   | N | Not           | No  | Olden and Naiman (2010); Pozo et al. 1997; Hart & Sherman 1996                                                                          |
| Q_124 | Is the river below the dam missing aquatic species with life histories dependent on specific sediment sizes?                                                       | EHA + NPD | Down-stream | Y | Taxa-Specific | No  | McManamay et al. 2013                                                                                                                   |
| Q_125 | Is there a need to conduct routine community surveys or monitoring of populations or communities?                                                                  | All       | Project     | Y | Taxa-Specific | No  | Kupferberg et al. 2012; McManamay et al. 2013; Travnicek & Maceina 1994                                                                 |
| Q_126 | Does agricultural landcover occupy at least 10% of area in upstream watershed above facility?                                                                      | All       | Basin       | N | Not           | No  | Stickler et al. 2013; Knoll et al. 2003; Jones et al. 2004                                                                              |
| Q_127 | Are there human activities associated with nutrient loads(e.g, agriculture, aquaculture, urbanization, water treatment) in the watershed upstream of the facility? | All       | Basin       | N | Not           | No  | Stickler et al. 2013; Knoll et al. 2003; Smedberg et al. 2009; Jones et al. 2004                                                        |
| Q_128 | Is there an adult of an endangered species at risk of turbine passage and injury or mortality by blade strike?                                                     | All       | Basin       | Y | Taxa-Specific | No  | Deng et al. 2011; Pracheil et al. 2016                                                                                                  |
| Q_129 | Is there evidence of blade-strike injury and/or mortality (e.g., decapitation or amputation, turbine blade-strike scars on fish)?                                  | EHA       | Project     | Y | Taxa-Specific | Yes | Pracheil et al. 2016                                                                                                                    |
| Q_131 | Is there evidence of fish impingement against bar or trash racks, louvers, or other turbine screening devices?                                                     | EHA       | Project     | Y | Taxa-Specific | Yes | Noatch and Suski 2012                                                                                                                   |
| Q_132 | Is there free-flowing river habitat upstream or downstream of the project or between developments within the project?                                              | All       | Basin       | N | Not           | No  | Cote et al. 2009; Perkin and Gido 2012; Perkin et al. 2014; Nilsson et al. 2005; Grill et al. 2015; Hall et al. 2011; Jager et al. 2015 |
| Q_133 | If upstream industrial, agricultural, or urbanization activities are present, would                                                                                | All       | Basin       | N | Not           | No  | Stickler et al. 2013; Knoll et al. 2003; Jones et al. 2004                                                                              |

|       |                                                                                                                             |              |                 |   |     |     |                                                                                      |
|-------|-----------------------------------------------------------------------------------------------------------------------------|--------------|-----------------|---|-----|-----|--------------------------------------------------------------------------------------|
|       | you consider them intense<br>(i.e., >20% landcover)?                                                                        |              |                 |   |     |     |                                                                                      |
| Q_134 | Is the fish community unnaturally dominated by generalists (e.g., sunfish, "cosmopolitan" species)                          | EHA +<br>NPD | Down-<br>stream | Y | Not | No  | Anderson et al. 2006; Freeman Marcinek 2006                                          |
| Q_135 | Does urban or developed landcover occupy at least 10% of area in upstream watershed above facility?                         | All          | Basin           | N | Not | No  | Stickler et al. 2013; Smedberg et al. 2009; Esselman et al. 2011                     |
| Q_136 | Is upstream sedimentation and land use practices contributing to increased levels of sedimentation in the reservoir?        | All          | Basin           | N | Not | No  | Baade et al. 2012                                                                    |
| Q_137 | Is urbanization and/or suburban development significant in lands surrounding the reservoir?                                 | EHA +<br>NPD | Reservoir       | N | Not | No  | Zhao et al. 2010, 2013                                                               |
| Q_138 | Under baseflow conditions, do parts of the channel remain dry or uninundated, potentially limiting habitat for some guilds? | EHA +<br>NPD | Down-<br>stream | N | Not | No  | Tennant 1976; Orth & Maughn 1981; Travnichek & Maceina 1994; Freeman et al. 2001     |
| Q_139 | Will habitat-based instream flow criteria (IFIM, PHABSM) likely be used for evaluating alternative flow regimes?            | All          | Project         | Y | Not | No  | Bovee 1982; Bovee et al. 1998; Orth 1987; Leonard & Orth 1988; Stalnaker et al. 2017 |
| Q_140 | Has or will the project resulted in loss of acreage or impact to protected lands?                                           | All          | Project         | N | Not | Yes | Ouyang et al. 2009;                                                                  |

**Table S3.** Environmental-envelop model answers for GZBP and cascade GZBP&TGP.

| <b>Question</b>                                                                                              | <b>Answer for<br/>GZBP</b> | <b>Answer for<br/>GZBP&amp;TGP</b> | <b>Notes</b>                                                  |
|--------------------------------------------------------------------------------------------------------------|----------------------------|------------------------------------|---------------------------------------------------------------|
| What is the size of the project in megawatts?                                                                | 2715                       | 25215                              | GRanD database                                                |
| What is the mean annual flow (cms) of river being im-<br>pounded?                                            | 14300                      | 14300                              |                                                               |
| How high is the dam in meters?                                                                               | 47                         | 185                                |                                                               |
| What is the storage of the reservoir(s) in megaliters?                                                       | 1580000                    | 39300000                           |                                                               |
| What is the surface area of the reservoir(s) in square<br>kilometers?                                        | 53.2                       | 1084                               |                                                               |
| How many total fish species of conservation concern<br>are located in project area or basin?                 | 2                          | 40                                 | List of key protected wild animals<br>in China (2021)         |
| How many total aquatic species of conservation con-<br>cern are located in project area or basin?            | 2                          | 2                                  | List of key protected wild animals<br>in China (2021)         |
| How many terrestrial species of conservation concern<br>are located in the project area or basin?            | 0                          | 40                                 | List of National Key Protected<br>Wild Plants in China (2021) |
| Will the project impact any habitats critically im-<br>portant for sustaining species at risk of extinction? | Yes                        | Yes                                |                                                               |
| Will the project impact lands of conservation value?                                                         | Yes                        | Yes                                |                                                               |

## Figures

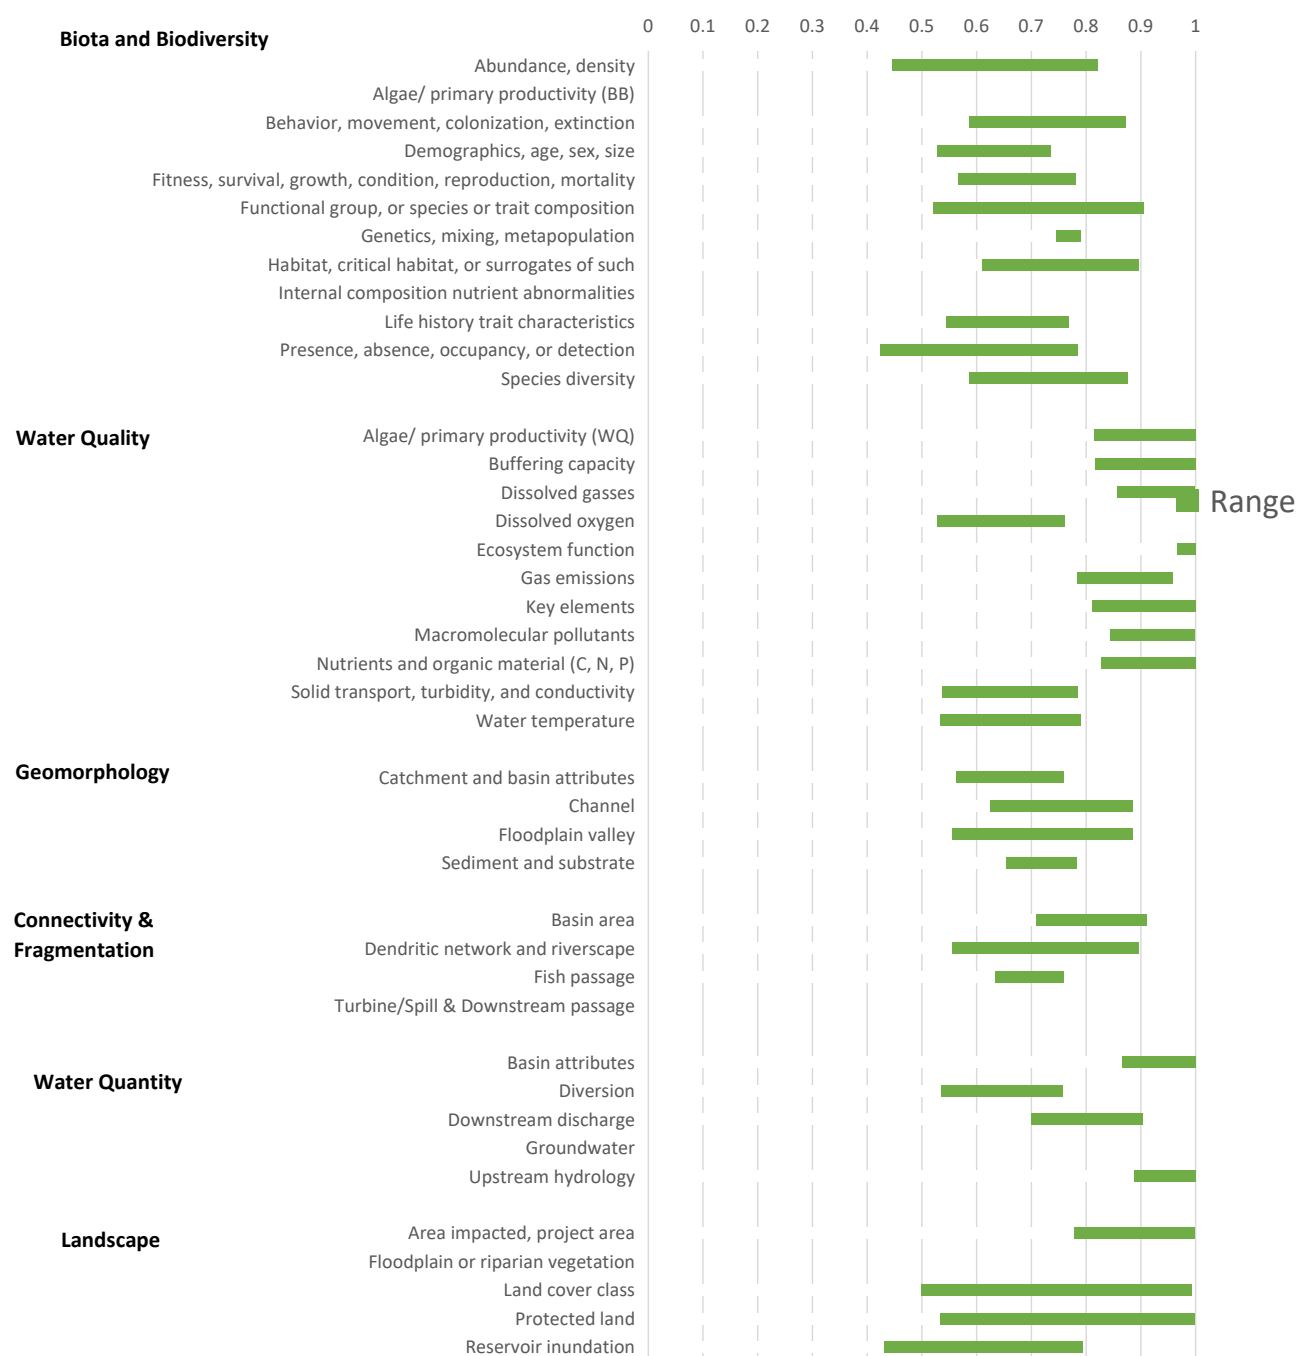

Figure S1 Predictive EEM ranges of new developed GZBP

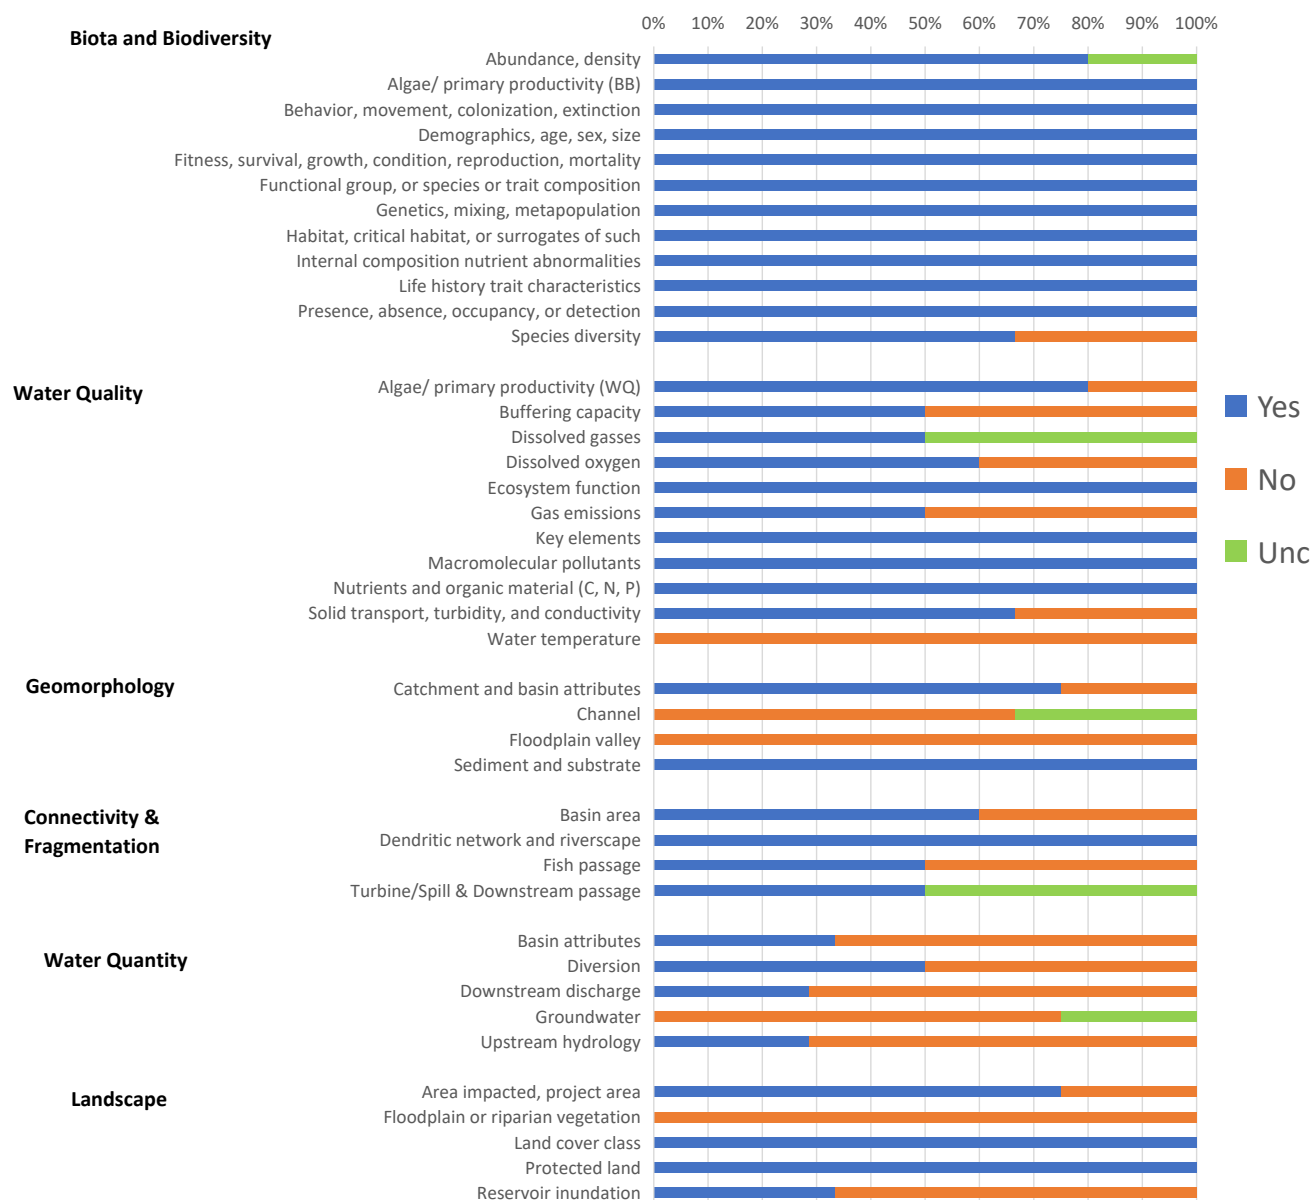

Figure S2 The proportion of questions answered "yes", "no", or "uncertain" relative to different river functions for new developed GZBP

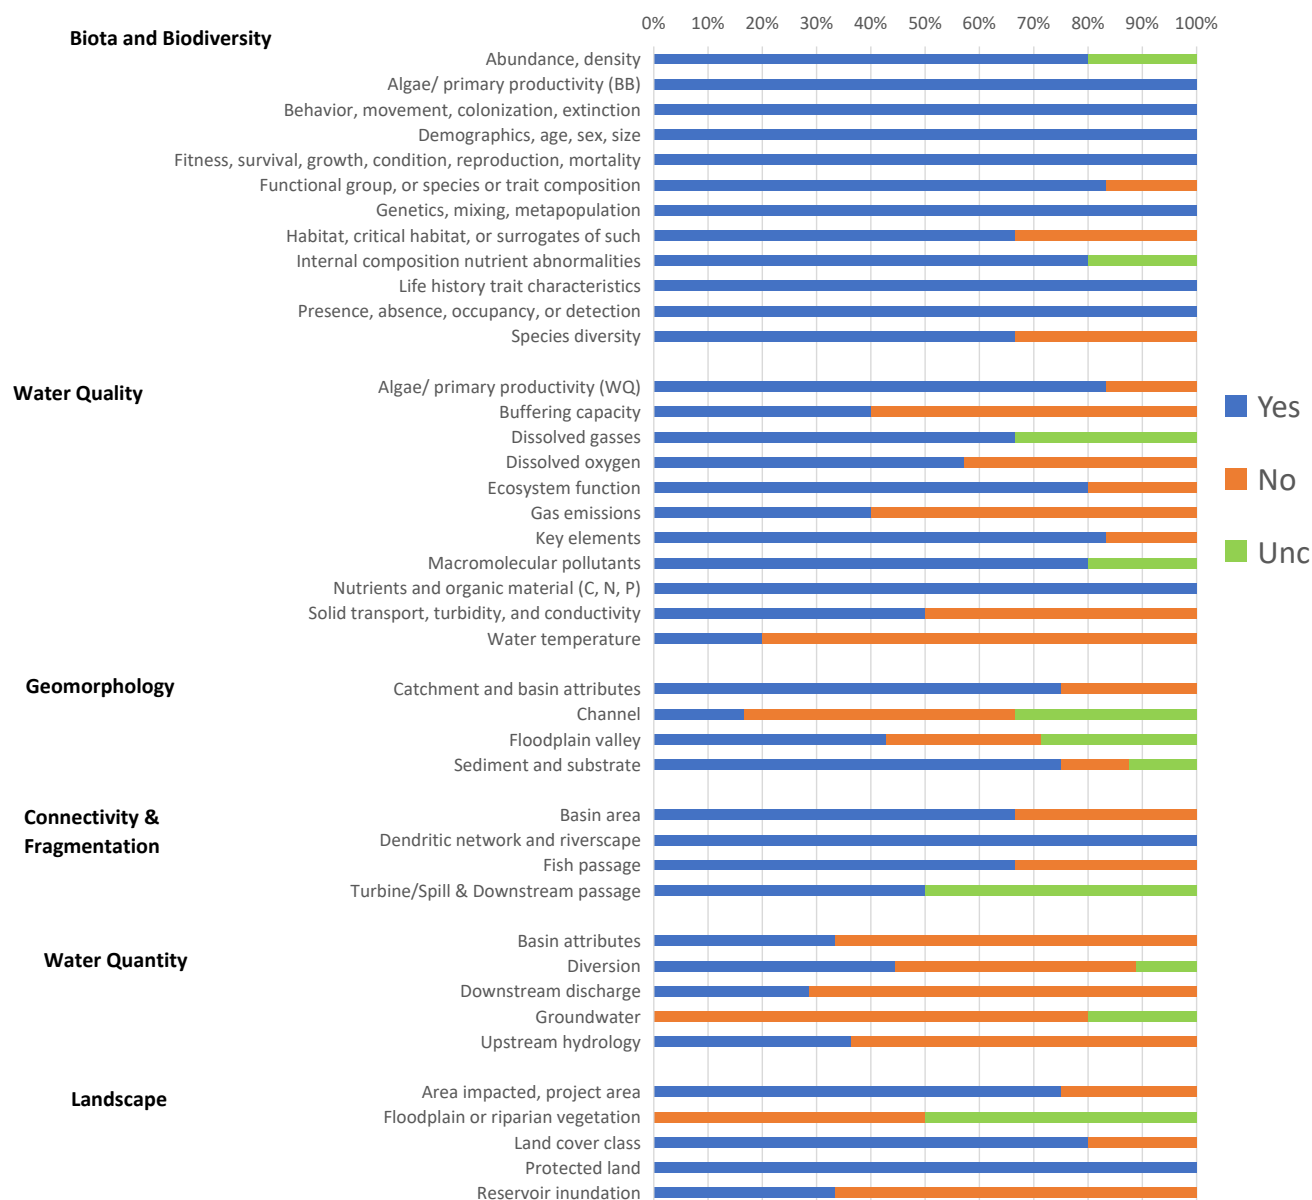

Figure S3 The proportion of questions answered "yes", "no", or "uncertain" relative to different river functions for existing

GZBP

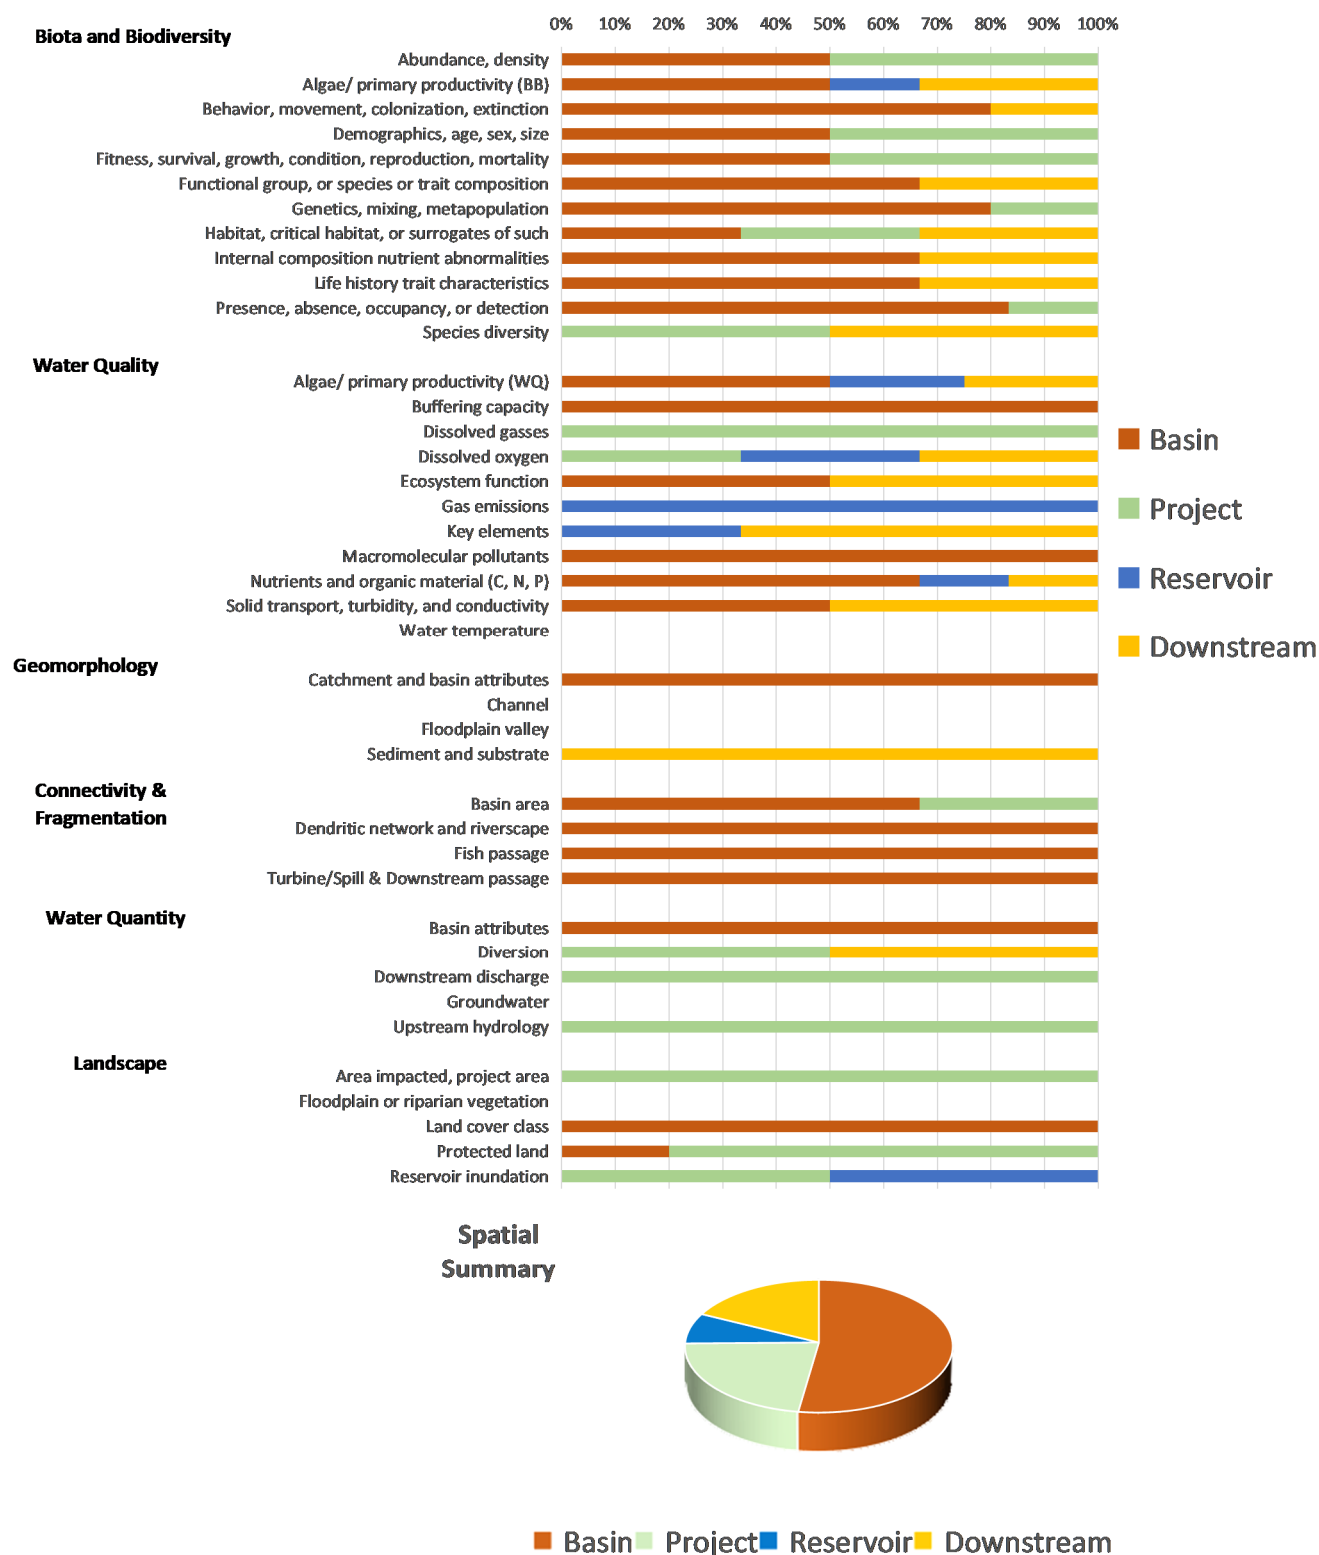

Figure S4 The proportion of questions answered "yes" according to different river functions that are relevant to specific spatial scales for new developed GZBP

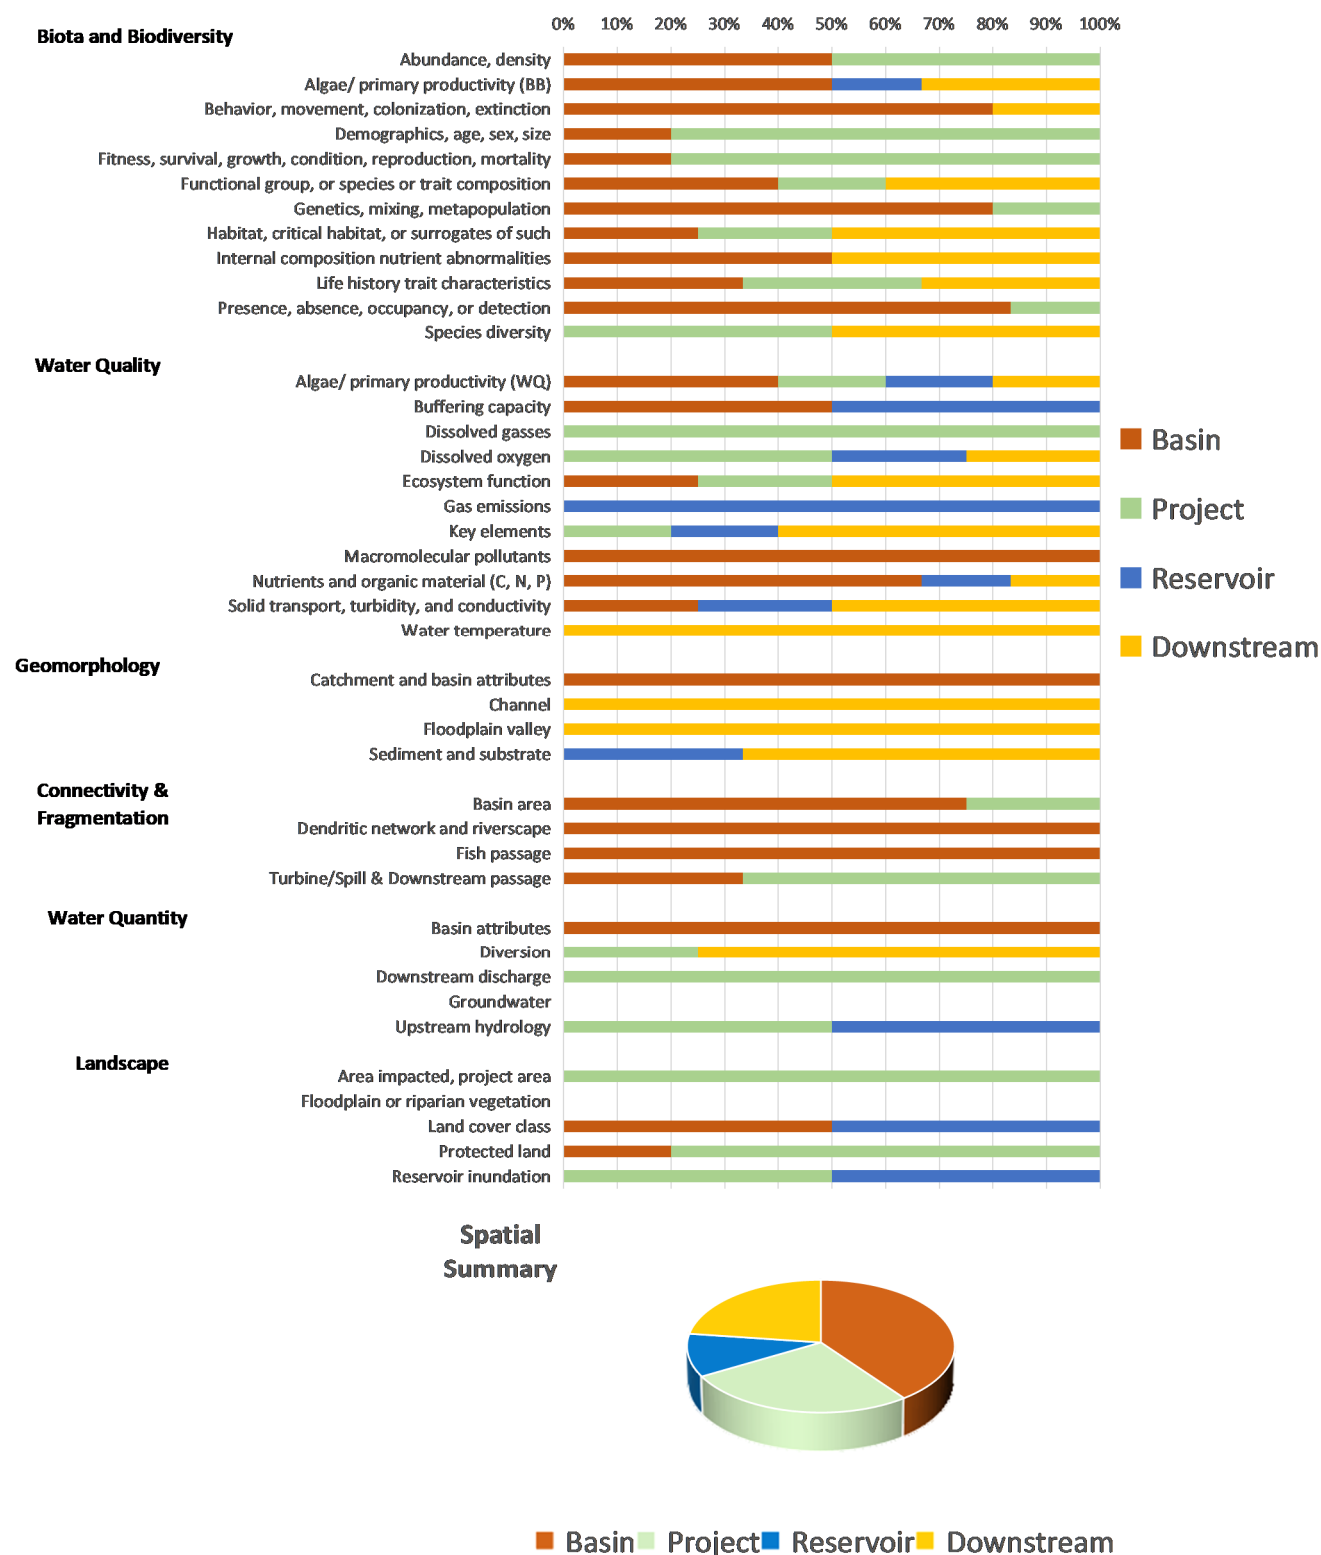

Figure S5 The proportion of questions answered "yes" according to different river functions that are relevant to specific spatial scales for existing GZBP

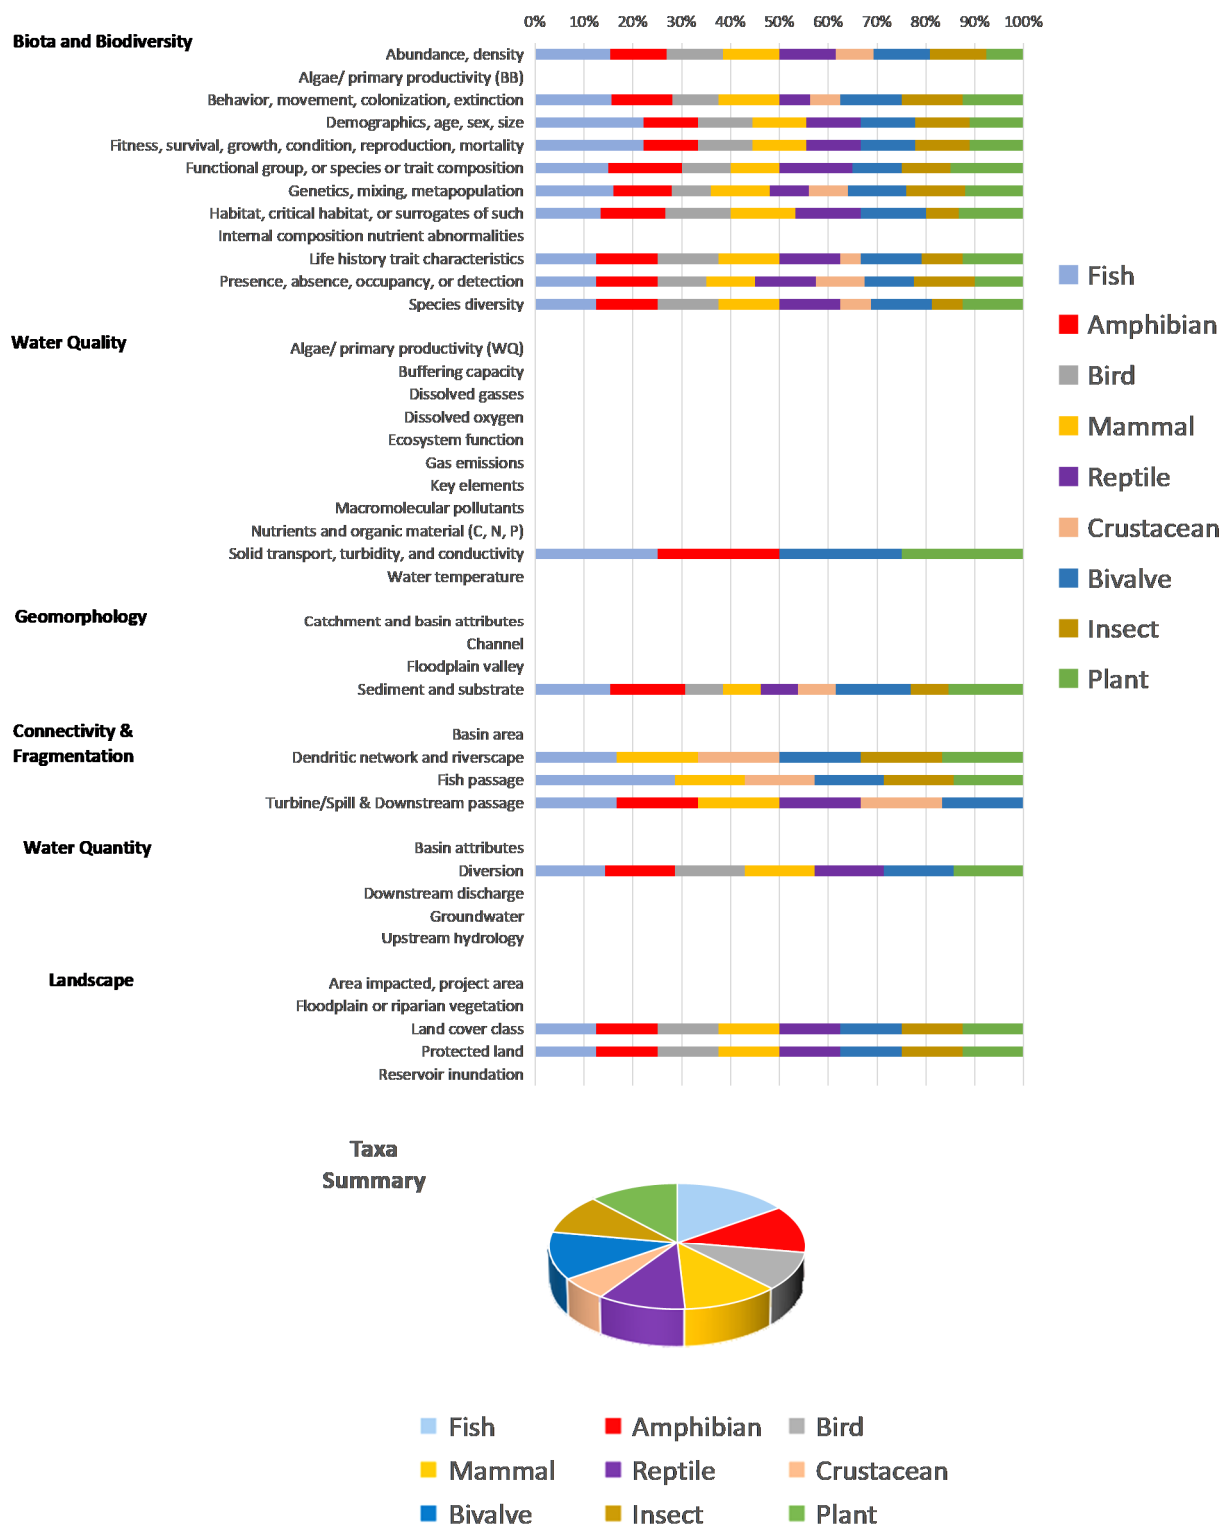

Figure S6 The proportion of questions answered "yes" according to different river functions that are relevant to specific taxonomic groups for new developed GZBP

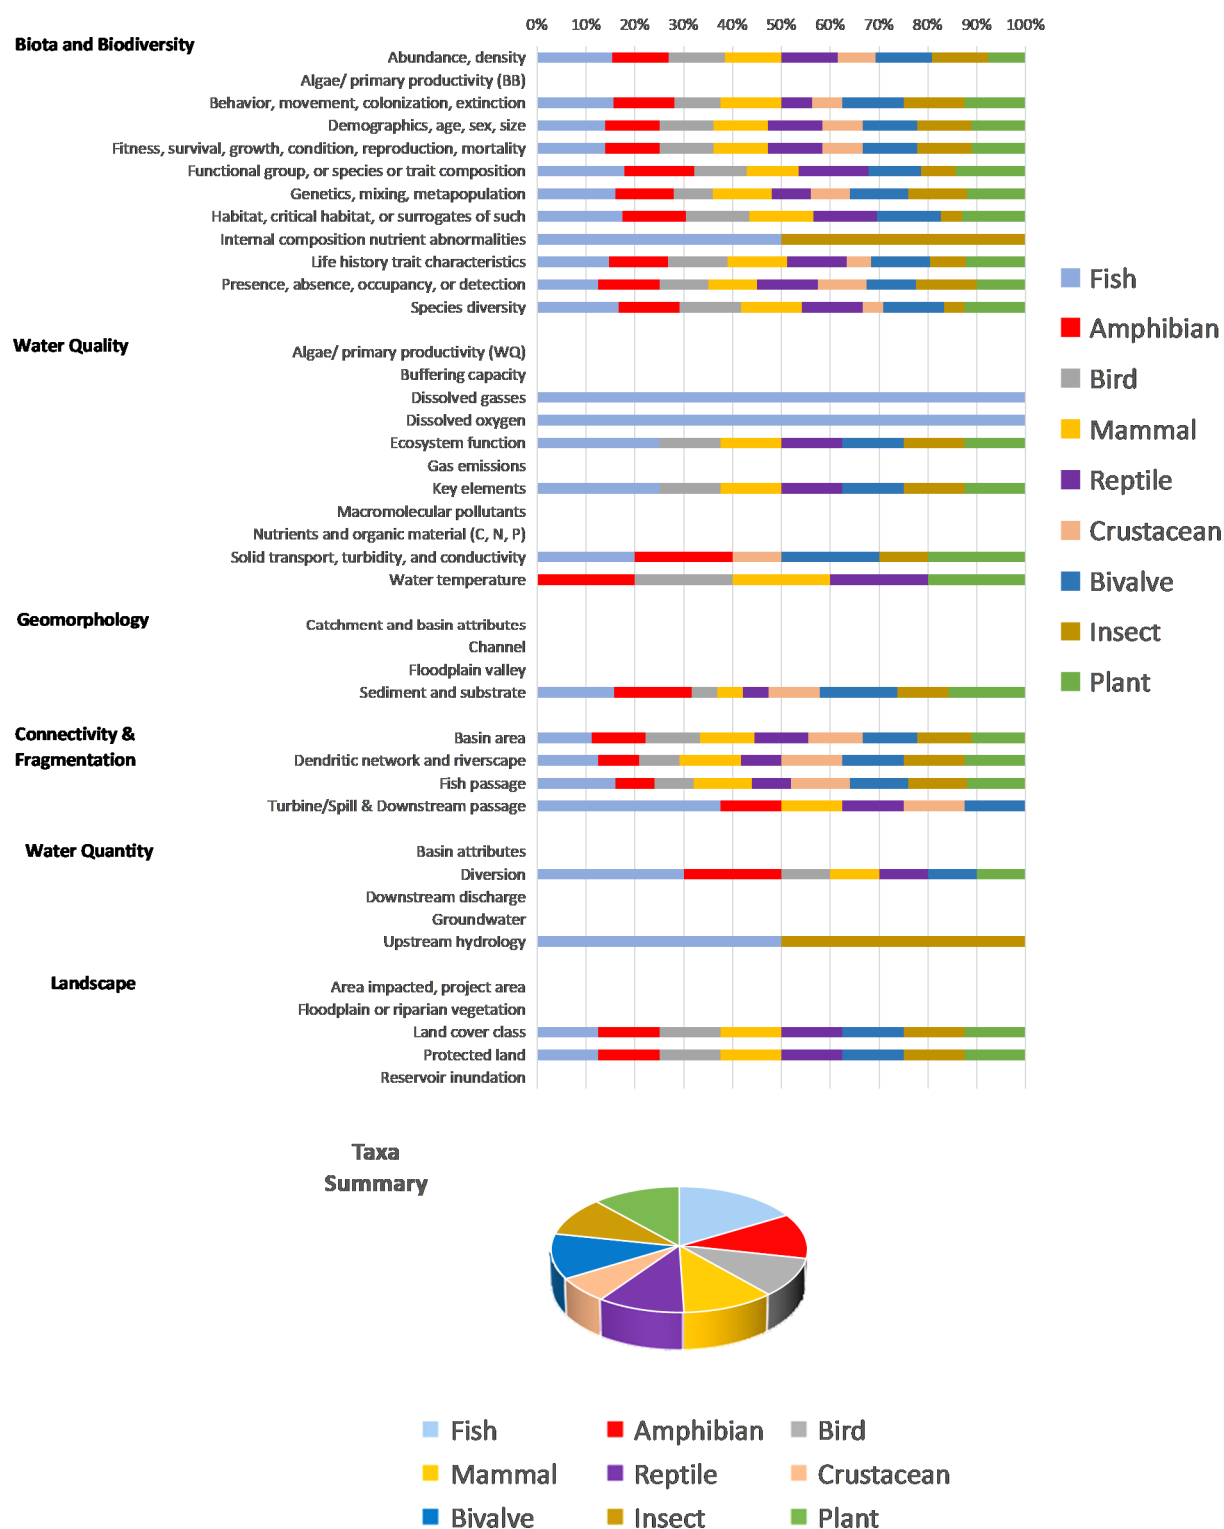

Figure S7 The proportion of questions answered "yes" according to different river functions that are relevant to specific

taxonomic groups for new developed GZBP

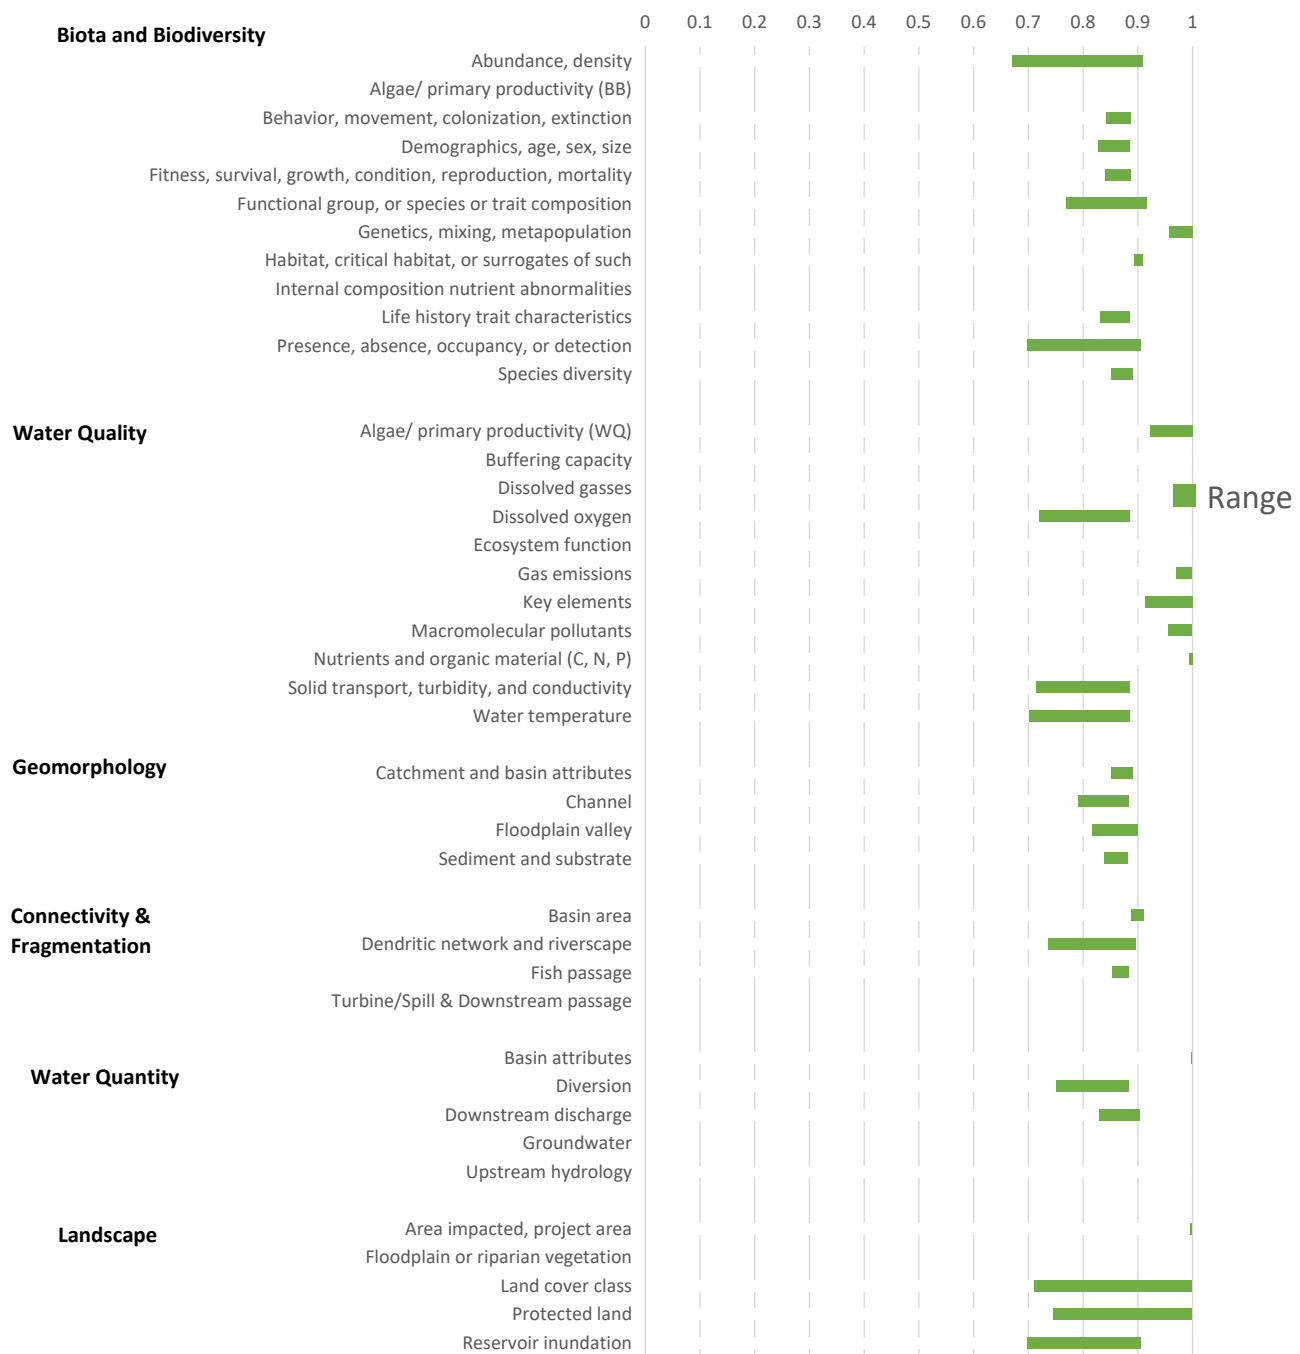

Figure S8 Predictive EEM ranges of new developed cascade GZBP&amp;TGP

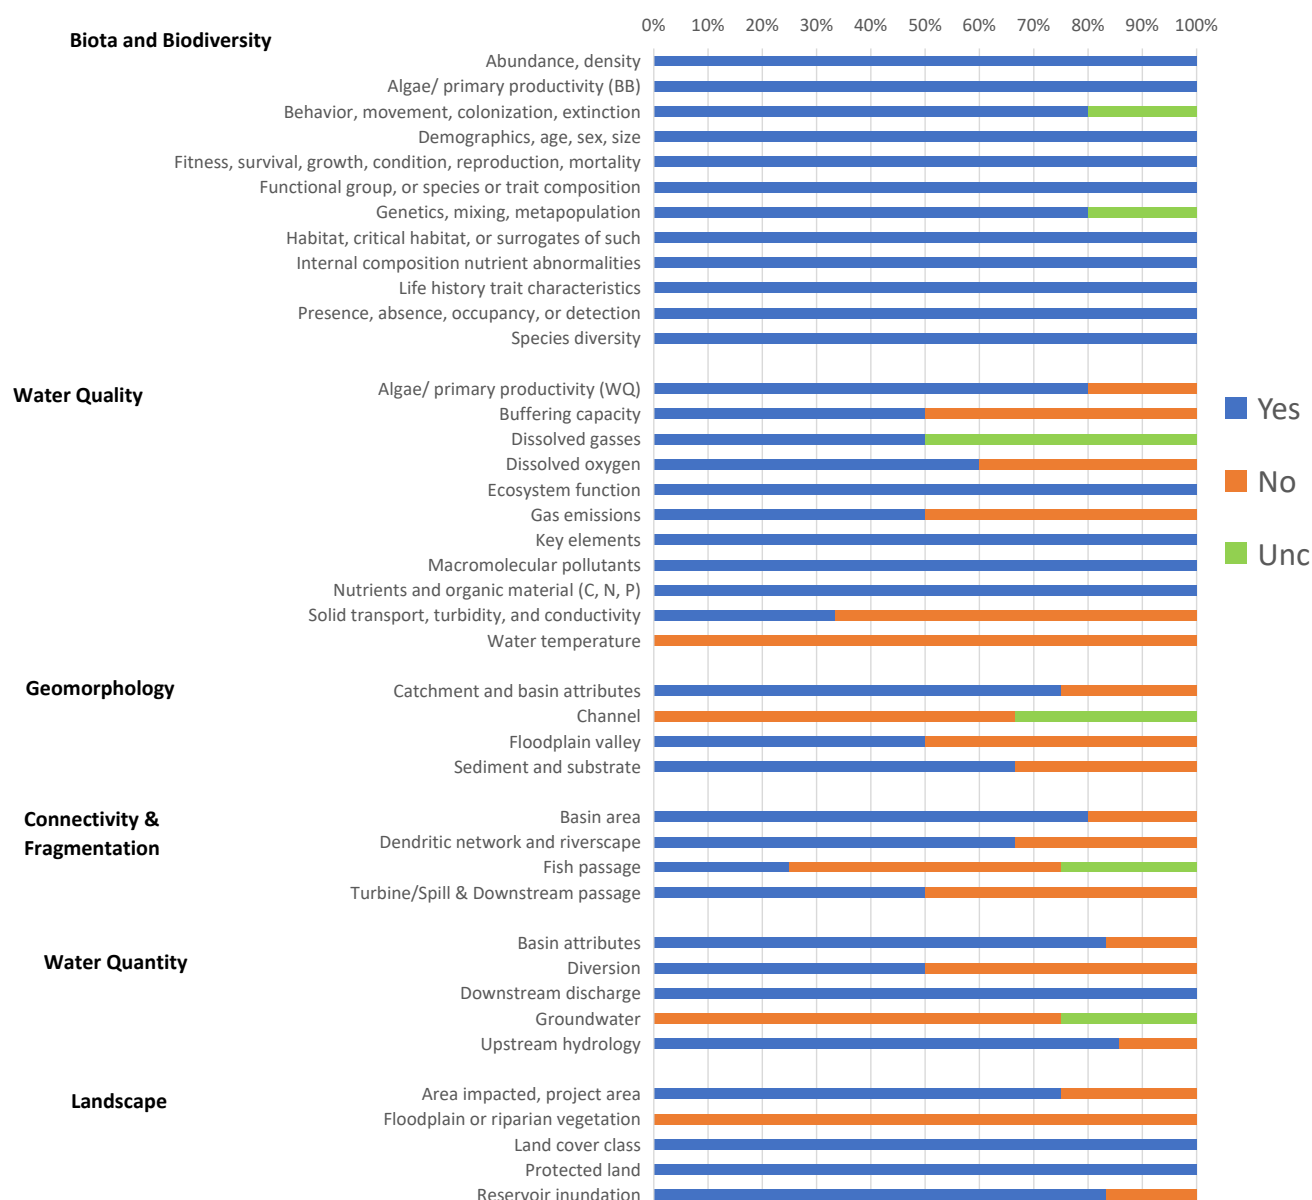

Figure S9 The proportion of questions answered "yes", "no", or "uncertain" relative to different river functions for new developed cascade GZBP&TGP

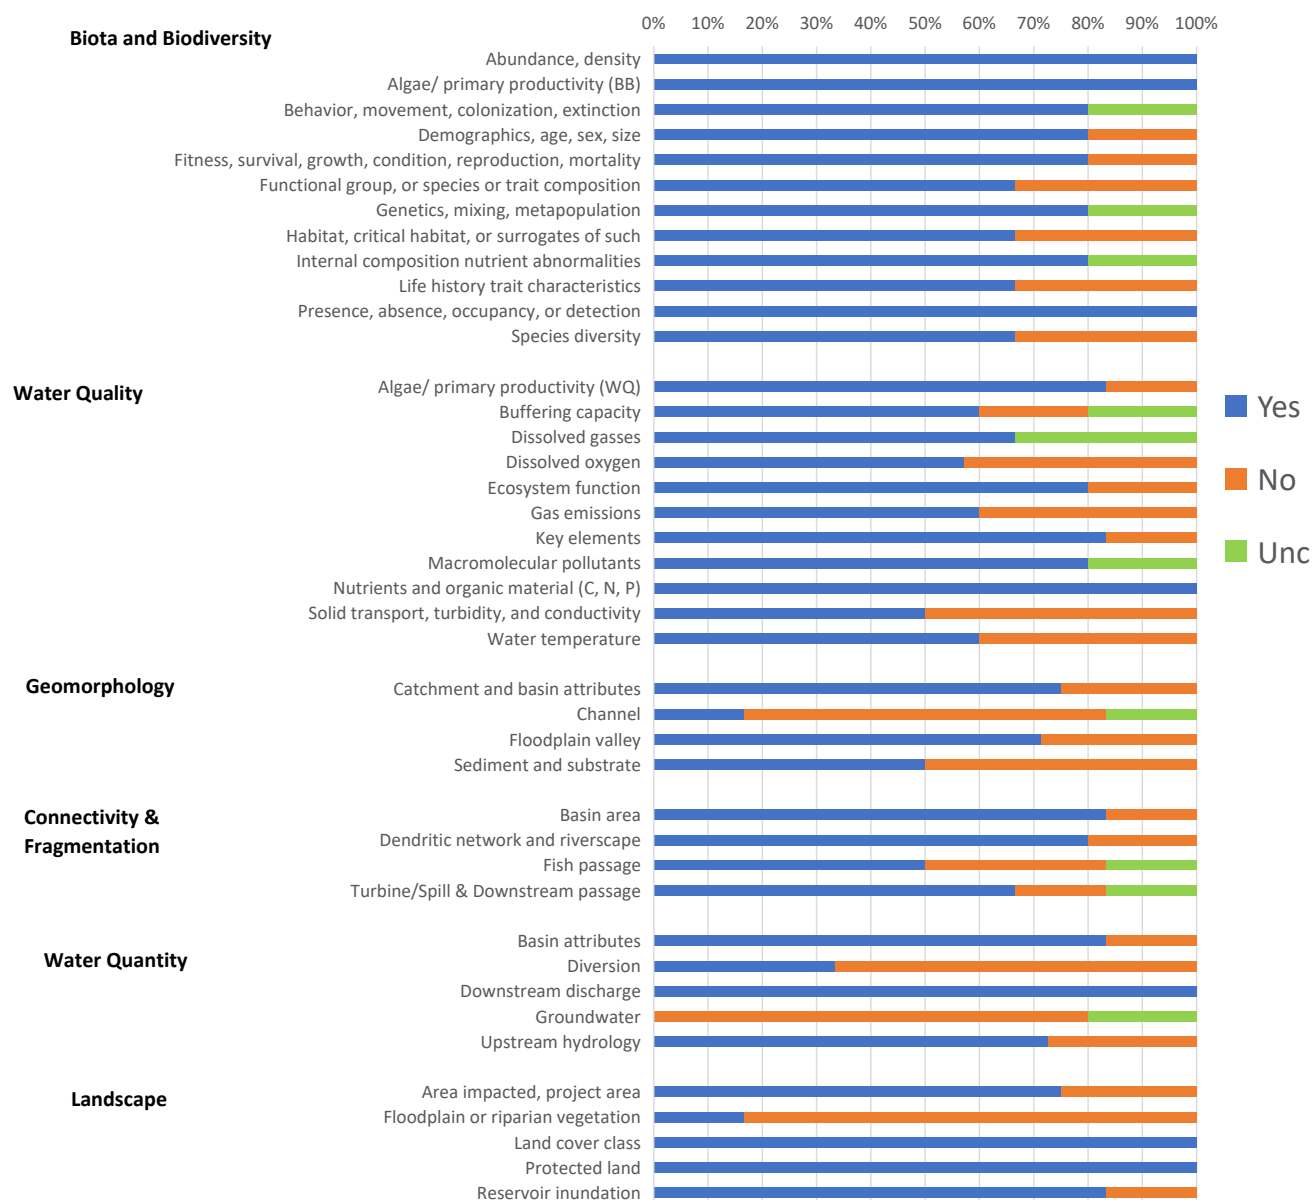

Figure S10 The proportion of questions answered "yes", "no", or "uncertain" relative to different river functions for existing cascade GZBP&TGP

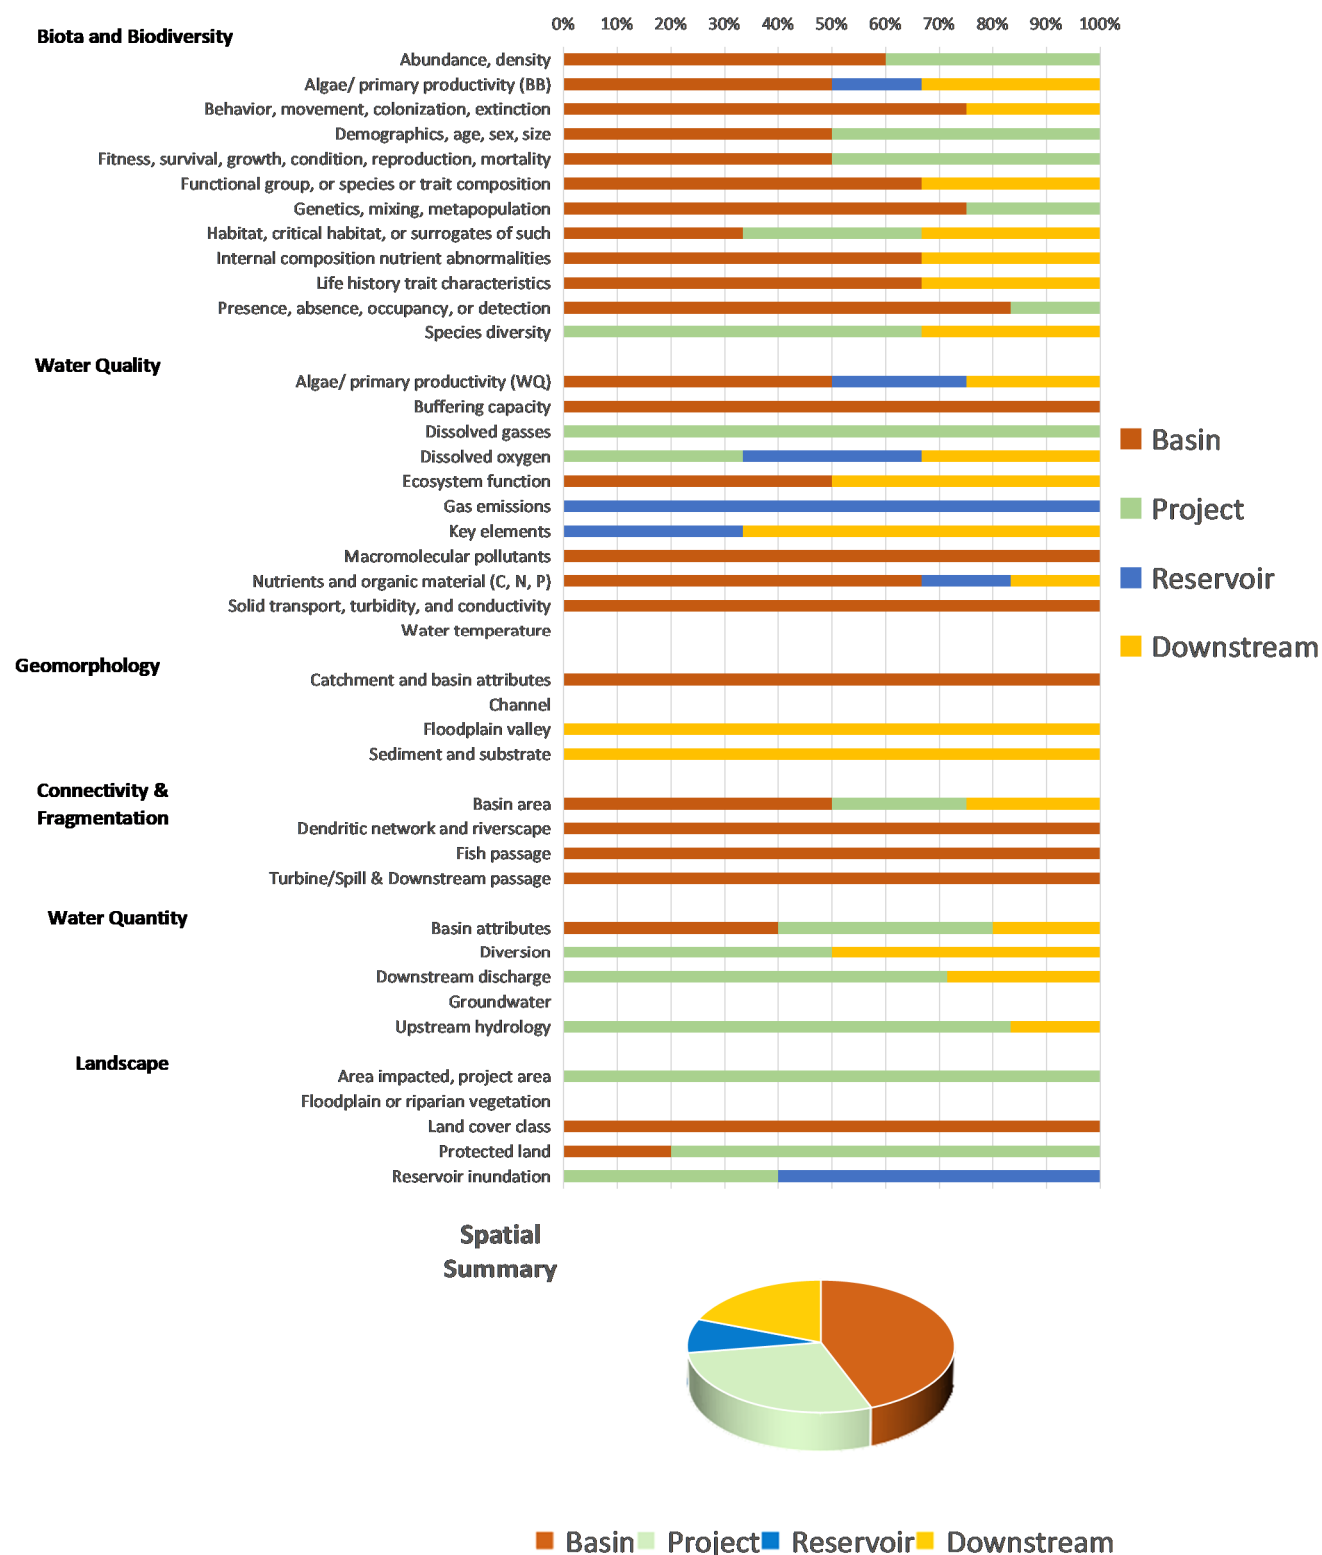

Figure S11 The proportion of questions answered "yes" according to different river functions that are relevant to specific spatial scales for new developed cascade GZBP&TGP

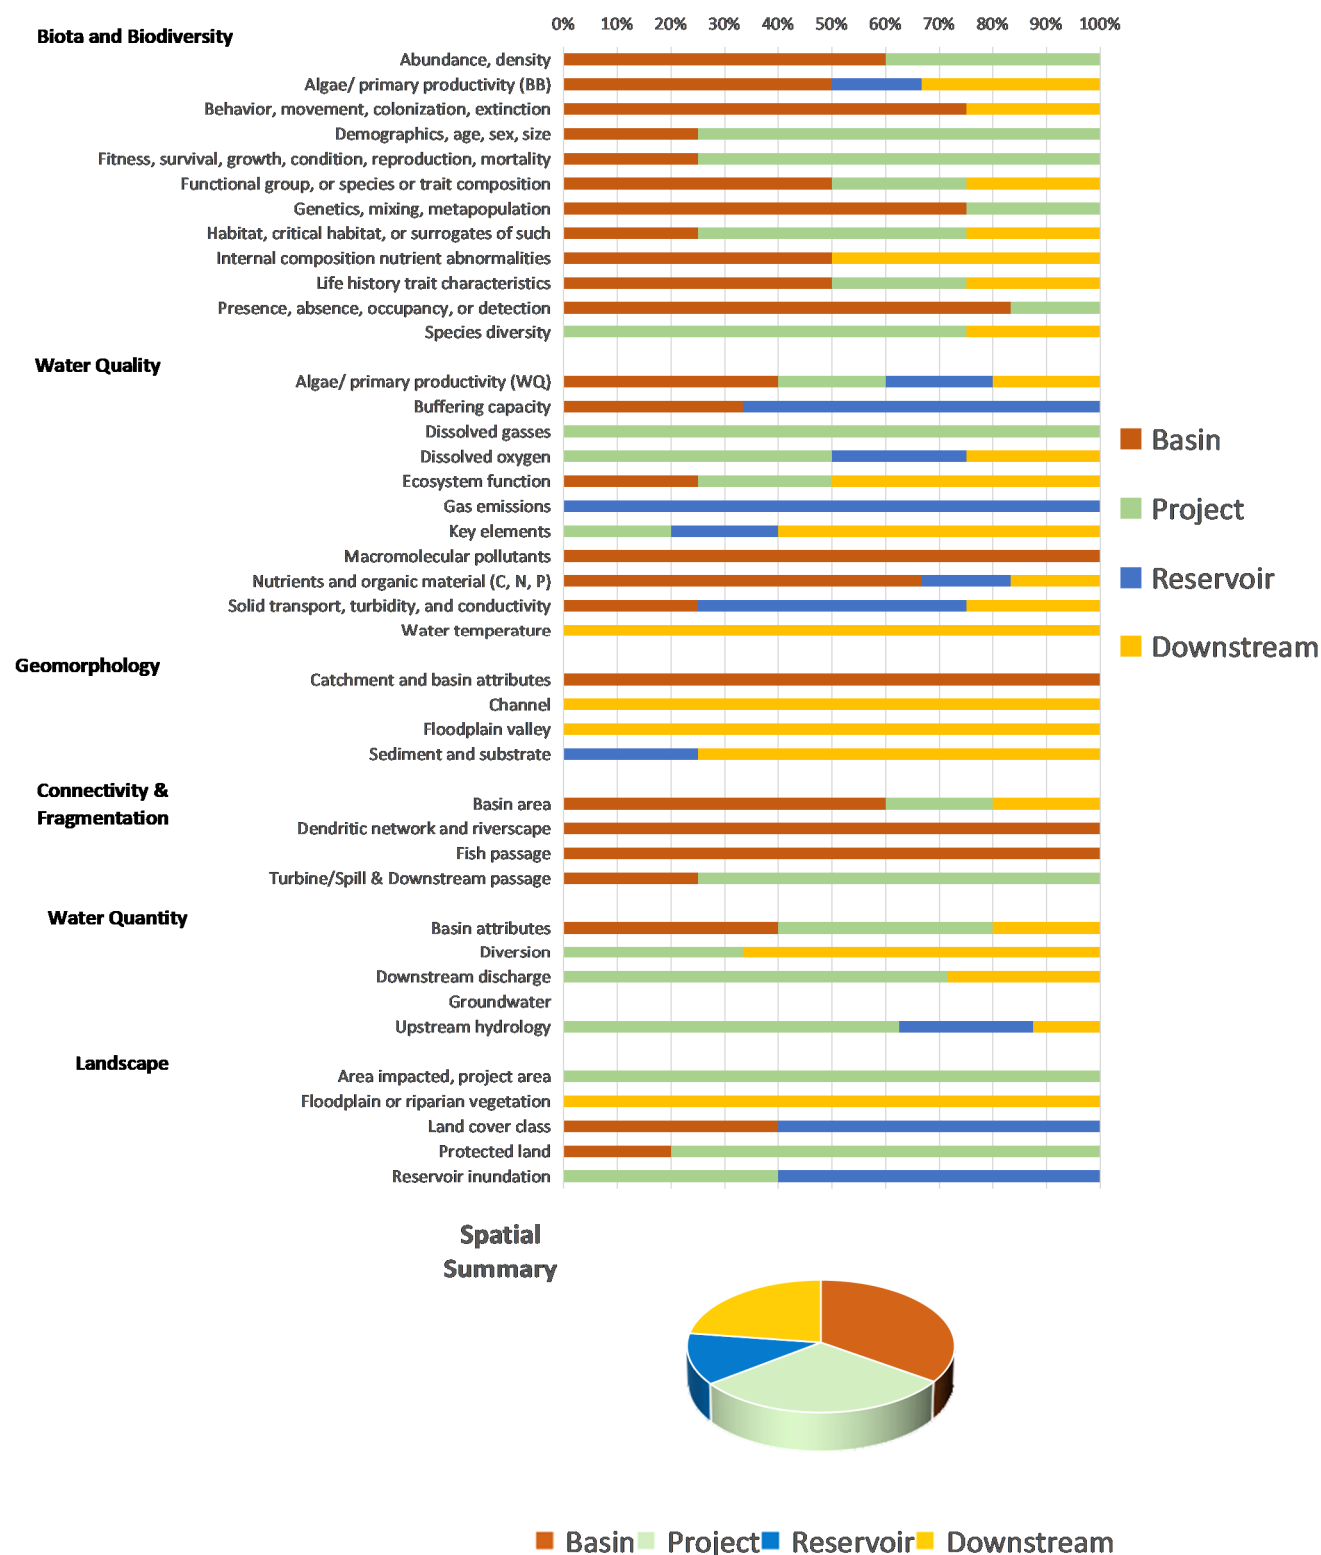

Figure S12 The proportion of questions answered "yes" according to different river functions that are relevant to specific spatial scales for existing cascade GZBP&TGP

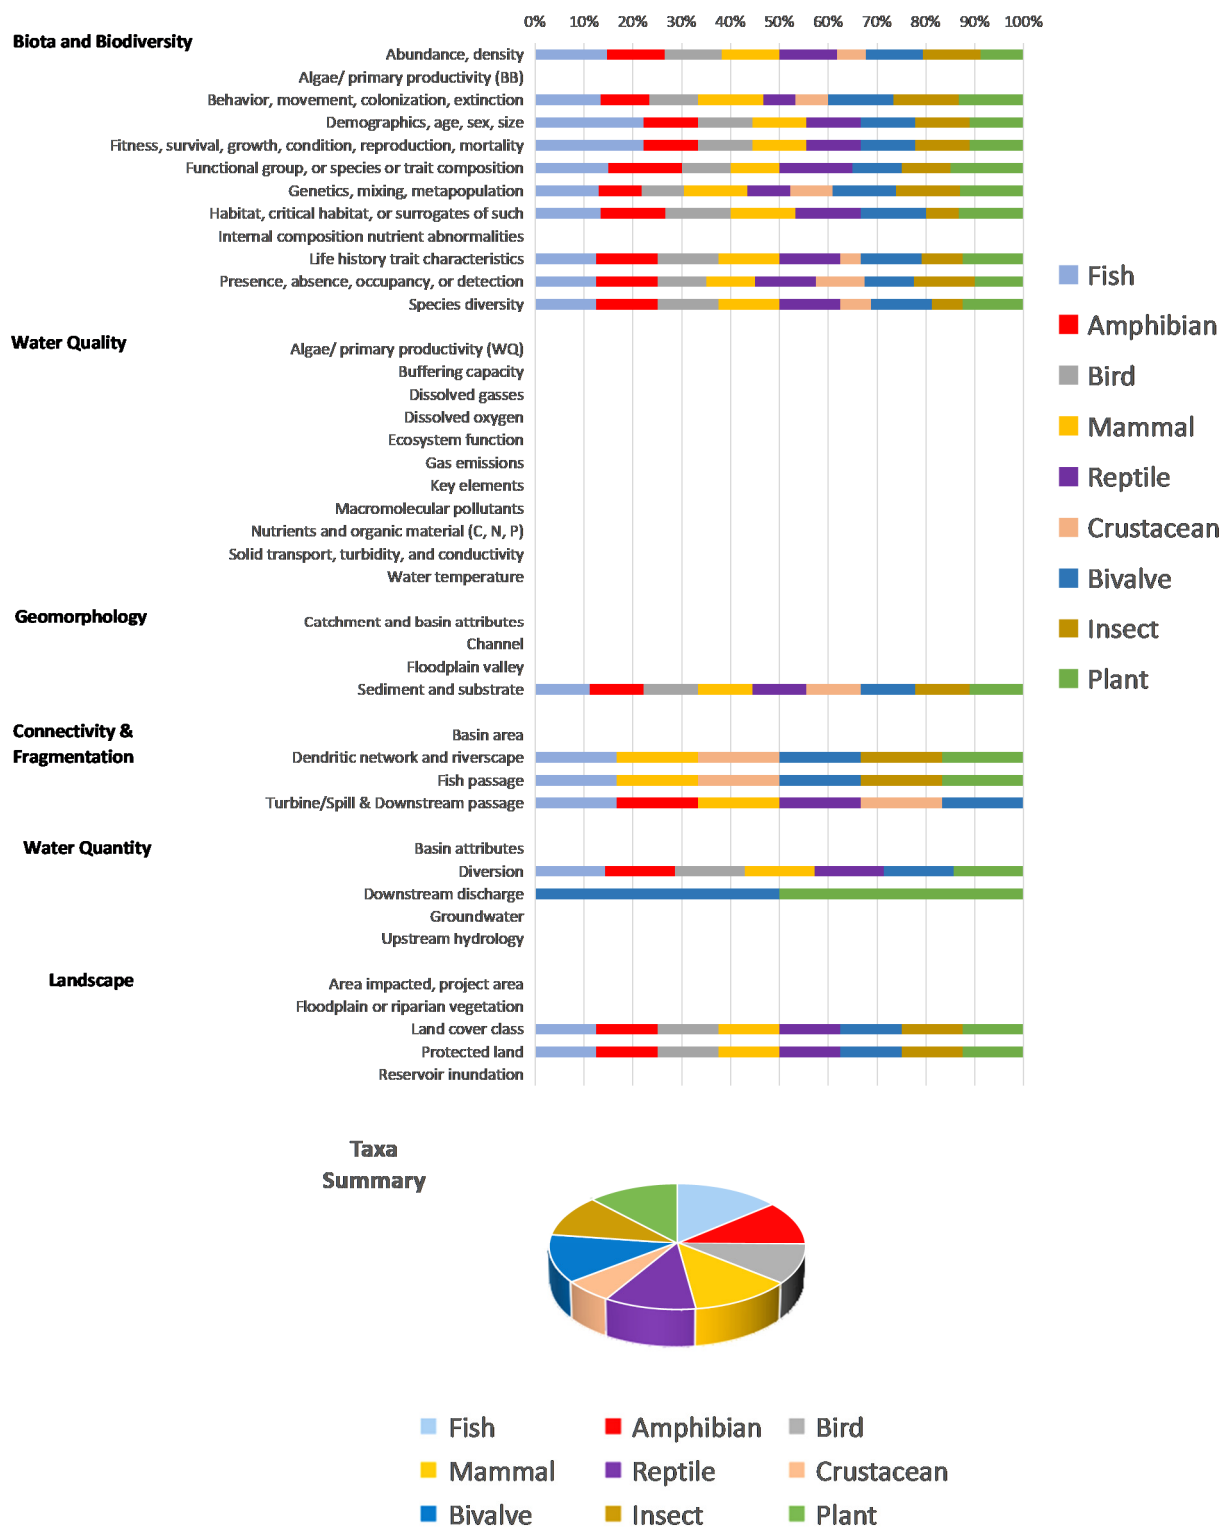

Figure S13 The proportion of questions answered "yes" according to different river functions that are relevant to specific taxonomic groups for new developed cascade GZBP&TGP

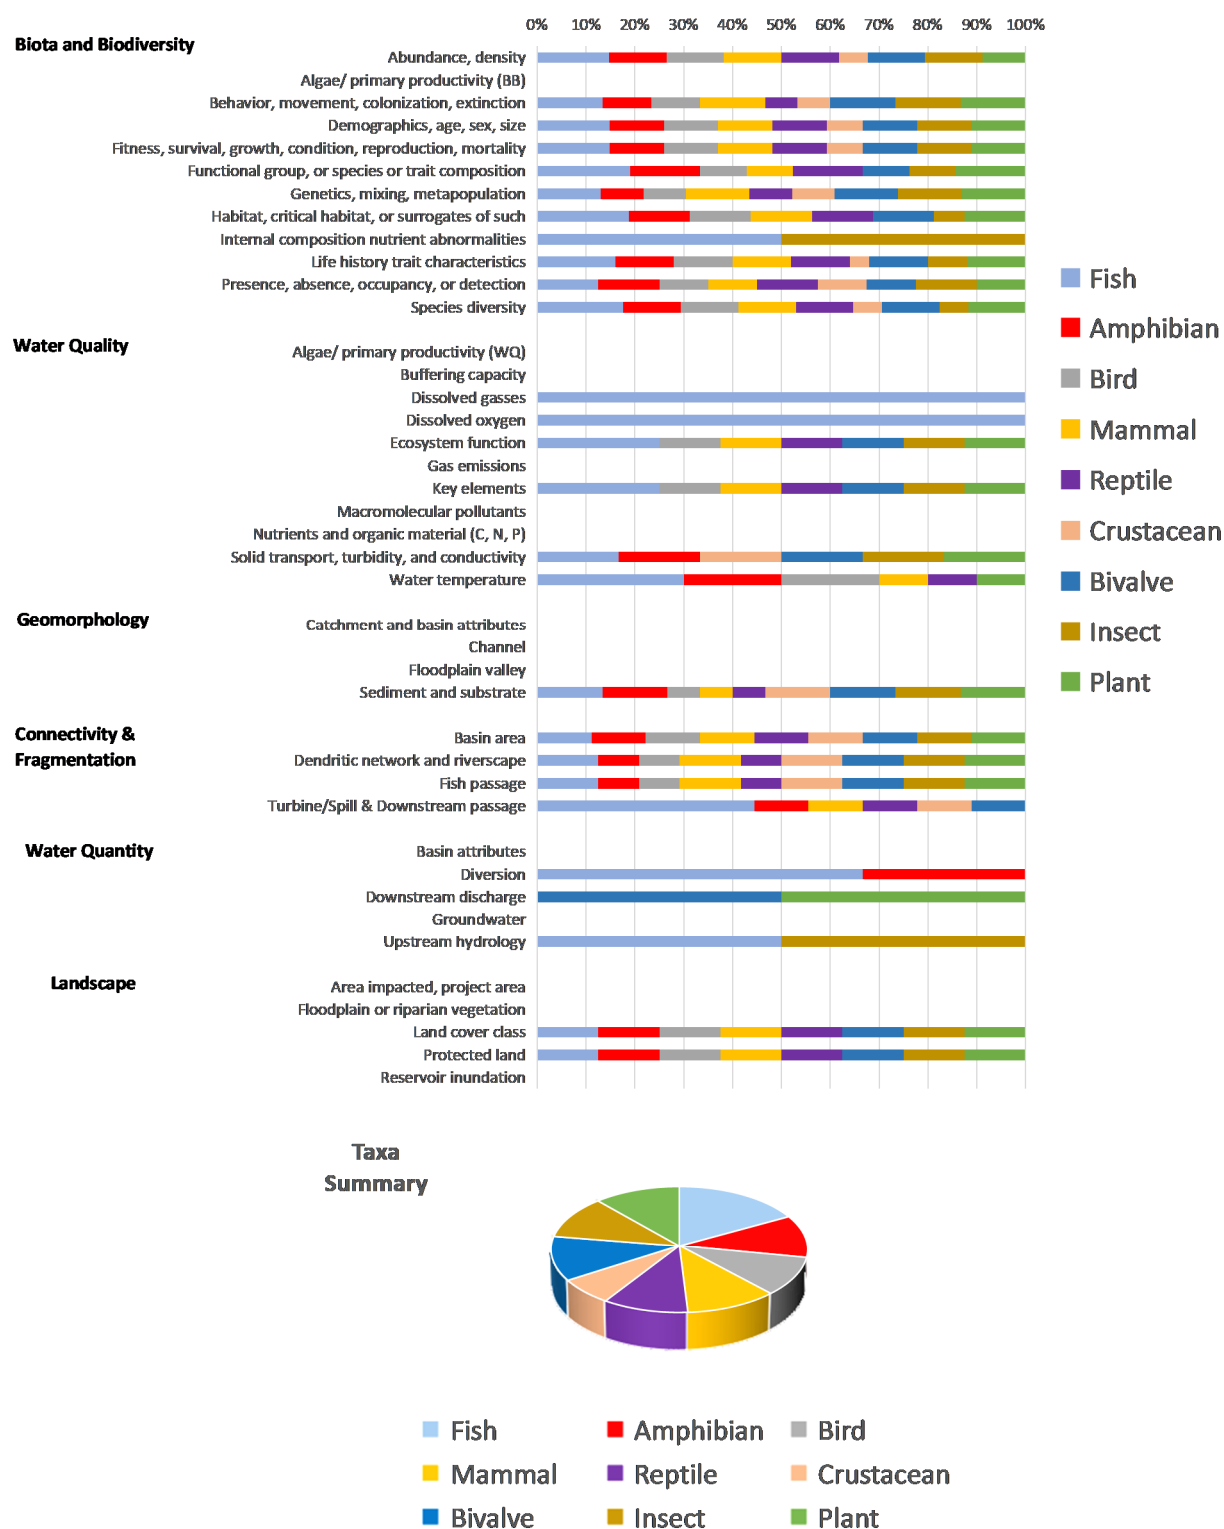

Figure S14 The proportion of questions answered "yes" according to different river functions that are relevant to specific

taxonomic groups for new developed cascade GZBP&TGP
